## 1 **Systematic analysis of innate immune antagonism reveals vulnerabilities of SARS-CoV-2**

2 Manuel Hayn\*<sup>1</sup>, Maximilian Hirschenberger\*<sup>1</sup>, Lennart Koepke\*<sup>1</sup>, Jan H Straub<sup>1</sup>, Rayhane Nchioua<sup>1</sup>,  
3 Susanne Klute<sup>1</sup>, Caterina Prelli Bozzo<sup>1</sup>, Wasim Aftab<sup>3,4</sup>, Fabian Zech<sup>1</sup>, Carina Conzelmann<sup>1</sup>, Janis A  
4 Müller<sup>1</sup>, Smitha Srinivasachar Badarinarayan<sup>1</sup>, Christina M Stürzel<sup>1</sup>, Ignasi Forne<sup>3</sup>, Steffen Stenger<sup>5</sup>,  
5 Karl-Klaus Conzelmann<sup>2</sup>, Jan Münch<sup>1</sup>, Daniel Sauter<sup>1</sup>, Axel Imhof<sup>3</sup>, Frank Kirchhoff<sup>1</sup> and Konstantin  
6 MJ Sparrer<sup>1</sup>

7 \*contributed equally, in alphabetical order.

8

### 9 Affiliations:

10 1 Institute of Molecular Virology  
11 Ulm University Medical Center  
12 89081 Ulm, Germany

13 2 Gene Center & Max von Pettenkofer-Institute of Virology  
14 Ludwig-Maximilians-University of Munich  
15 81377 Munich, Germany

16 3 Biomedical Center, Zentrallabor für Proteinanalytik (Protein Analysis Unit)  
17 Department of Molecular Biology,  
18 Ludwig-Maximilians-University of Munich  
19 82152 Planegg-Martinsried, Germany

20 4 Graduate School for Quantitative Biosciences (QBM)  
21 Ludwig-Maximilians-University of Munich  
22 81377 Munich, Germany

23 5 Institute for Medical Microbiology and Hygiene  
24 Ulm University Medical Center  
25 89081 Ulm, Germany

26 Correspondence: [Konstantin.Sparrer@uni-ulm.de](mailto:Konstantin.Sparrer@uni-ulm.de)

27 Running Title: Interplay between innate immunity and SARS-CoV-2

28 **KEYWORDS**: Innate Immunity, Autophagy, Interferon, SARS-CoV-2, SARS-CoV-1

29 **ABSTRACT**

30 The innate immune system efficiently defends the human host against viral pathogens. Thus, viruses  
31 evolved strategies to counteract immune activation. Here, we systematically analysed the impact of 29  
32 SARS-CoV-2 encoded proteins on three major arms of our cell-intrinsic innate immune defences:  
33 interferon (IFN) induction, cytokine signalling and autophagy. Subsequent mechanistic analyses  
34 revealed that SARS-CoV-2 proteins target the respective signalling cascades at multiple steps. For  
35 example, we show that Nsp14 reduces endogenous IFN receptor levels and ORF3a and ORF7a perturb  
36 the late endosomal/trans-Golgi network. Our data demonstrates that most antagonistic activities are  
37 conserved between proteins encoded by SARS-CoV-2, the closely related bat RaTG13-CoV and the  
38 highly pathogenic SARS-CoV-1. However, SARS-CoV-1 Nsp15 is strikingly more potent in  
39 suppressing IFN induction and signalling than its SARS-CoV-2 counterpart. This may help explain the  
40 lower pathogenicity of SARS-CoV-2, which facilitated its rapid spread. Overall our analyses revealed  
41 that IFN- $\gamma$  and IFN- $\lambda$ 1 signalling are antagonised the least, leaving SARS-CoV-2 highly susceptible to  
42 these two cytokines. Their combination synergistically potentiated the anti-viral effects against SARS-  
43 CoV-2 at low concentrations. Taken together, our results allow an explanation for differences in  
44 susceptibility towards IFNs and provide evidence that rational immune activation may be an effective  
45 future therapeutic strategy against SARS-CoV-2. (200 words)

## 46 INTRODUCTION

47 The severe acute respiratory syndrome coronavirus 2 (SARS-CoV-2) is a zoonotic, novel coronavirus  
48 that emerged at the end of 2019<sup>1-3</sup>. Infection with SARS-CoV-2 causes coronavirus disease 2019  
49 (COVID-19)<sup>4</sup>. The virus rapidly spread all over the world owing to its higher transmission rates<sup>5</sup>  
50 ( $R=2.5$ ), as well as a lower morbidity and case fatality rates (CFR 3-4%)<sup>6</sup> compared to previous  
51 epidemic coronaviruses like SARS-CoV-1 ( $R=2.0$ , CFR 11%) or MERS-CoV ( $R=0.9$ , CFR 35%)<sup>7-9</sup>.  
52 However, its pathogenicity is still much higher than that of ‘common cold’ CoVs such as HKU1 and  
53 229E<sup>10</sup> and to date SARS-CoV-2 has caused more than a millions deaths  
54 (<https://coronavirus.jhu.edu/map.html>).

55 Upon infection of a target cell, CoVs are recognised by innate immune sensors, for example via RIG-  
56 I-like receptors (RLRs)<sup>11</sup>, which activate cell-intrinsic innate immune defences (hereafter referred to as  
57 the innate immune system)<sup>12,13,14</sup>. However, the exact ligand triggering the response is unknown.  
58 Activation of RLRs induces signalling cascades that ultimately lead to the release of IFNs and other  
59 pro-inflammatory cytokines as well as induction of anti-viral effectors<sup>15</sup>. Released cytokines are  
60 subsequently also recognised by neighbouring cells and induce an antiviral transcriptional response.  
61 Thus, both the infected cell and non-infected neighbouring cells are set in an anti-viral state<sup>16,17</sup>  
62 eventually limiting viral spread. Other branches of the innate immune system, such as autophagy, are  
63 activated during CoV infections as well<sup>18,19</sup>. Autophagy is capable of targeting viral components or even  
64 whole viruses for lysosomal degradation<sup>20,21</sup> and SARS-CoV-2 has evolved to block autophagic  
65 turnover<sup>18</sup>. Eventually activation of innate immunity recruits and stimulates the adaptive immune  
66 system ultimately facilitating elimination of the virus<sup>22,23</sup>. Notably, inborn defects in innate immunity  
67 or auto-antibodies against IFNs are associated with high frequencies of severe COVID-19 cases,  
68 suggesting that innate defence mechanisms play a major role in immune control of SARS-CoV-2<sup>24,25</sup>.  
69 SARS-CoV-2 infections show higher numbers of subclinical, asymptomatic infections (up to 80%<sup>6</sup>)  
70 compared to previous epidemic CoVs such as SARS-CoV-1<sup>10</sup>. Indeed, recent evidence suggests that  
71 SARS-CoV-2 can be more efficiently antagonised by IFNs than SARS-CoV-1 *in vitro*<sup>26</sup>. However, the

72 underlying reasons for differences in IFN susceptibility between SARS-CoV-2 and SARS-CoV-1 are  
73 currently not fully understood.

74 Recent reports demonstrated that infection with SARS-CoV-2 induces an imbalanced innate immune  
75 response, indicating manipulation by SARS-CoV-2<sup>27,28</sup>. Proteomics analysis of selected SARS-CoV-2  
76 proteins revealed that innate immune activation is perturbed on multiple levels<sup>27</sup>. For example, it was  
77 suggested that ORF3a inhibits autophagic turnover, ORF8 alters Integrin-TGF $\beta$ -EGFR-RTK  
78 signalling<sup>27</sup> and ORF3b antagonises type I IFN induction by a yet unknown mechanism<sup>29</sup>. In addition,  
79 the SARS-CoV-2 non-structural protein 1 (Nsp1) shuts down cellular translation including the cytokine-  
80 mediated innate immune response<sup>30</sup>. Analysis of the interplay between SARS-CoV-2 proteins and IFN-  
81  $\beta$  induction and signalling revealed that at least eight SARS-CoV-2 proteins interfere with type I IFN  
82 signalling<sup>31,32</sup>. Among them is ORF6, which was suggested to interfere with nuclear trafficking of  
83 transcription factors thereby impairing gene induction<sup>32,33</sup>. However, so far only type I IFN signalling  
84 was analysed in some detail and our knowledge how SARS-CoV-2 manipulates innate immunity is far  
85 from being complete.

86 Currently, treatment with IFNs is explored in clinical trials against SARS-CoV-2<sup>34</sup>. However, patients  
87 receiving immunomodulatory therapy with IFNs generally suffer from severe side-effects including  
88 psychological symptoms such as depression<sup>35-37</sup>. Novel strategies which activate the immune system  
89 but reduce inflammation and lower doses of cytokines are required<sup>38</sup>. Thus, analysing how SARS-CoV-  
90 2 antagonises innate immunity may give valuable clues on viral vulnerabilities that might be exploited  
91 for effective and safe therapeutic immune control.

92 Here, we systematically analysed the impact of 29 SARS-CoV-2 encoded proteins<sup>29,39,40</sup> on the major  
93 branches of the cell-intrinsic innate immune system: IFN induction, IFN/pro-inflammatory cytokine  
94 signalling and autophagy. This identified Nsp1, Nsp3, Nsp5, Nsp10, Nsp13, Nsp14, ORF3a, ORF6,  
95 ORF7a and ORF7b as the major innate immune antagonists encoded by SARS-CoV-2. Interference  
96 with innate immune activation is achieved by using a diverse, synergistic set of mechanisms ranging  
97 from downregulation of IFN receptor expression by Nsp14 to blockage of autophagy via fragmentation  
98 of the trans-Golgi network by the viral proteins ORF3a and ORF7a. Strikingly, our data indicate that

99 Nsp15 of both RaTG13-CoV and SARS-CoV-2 counteract type I IFN induction and signalling much  
100 less efficiently than SARS-CoV-1 Nsp15. Our analyses of SARS-CoV-2 mediated counteraction of IFN  
101 signalling revealed that IFN- $\gamma$  and IFN- $\lambda$ 1 pathways are antagonised the least, and consequently  
102 treatment with these two cytokines is most potent against SARS-CoV-2. Combined IFN treatment at  
103 very low doses potentiates the individual anti-viral effect and can be further improved by anti-  
104 inflammatory autophagy activation. Thus, our results provide a plausible explanation why SARS-CoV-  
105 2 is more susceptible against IFN treatment than SARS-CoV-1 and indicate that combination of IFN- $\gamma$   
106 and IFN- $\lambda$ 1 is an effective anti-SARS-CoV-2 approach.

## 107 **RESULTS**

### 108 **A variety of SARS-CoV-2 proteins antagonise innate immune pathways**

109 To systematically examine how SARS-CoV-2 manipulates innate immunity, we used Strep II-tagged  
110 expression constructs<sup>39</sup> coding for 28 of the 30 currently reported SARS-CoV-2 proteins (Nsp1, Nsp2,  
111 Nsp4, Nsp5, Nsp6, Nsp7, Nsp8, Nsp9, Nsp10, Nsp11, Nsp12, Nsp13, Nsp14, Nsp15, Nsp16, S, ORF3a,  
112 ORF3c, E, M, ORF6, ORF7a, ORF7b, ORF8, ORF9b, N, ORF9c and ORF10) (Fig. 1a). In addition,  
113 we examined untagged Nsp3. Expression of all proteins was confirmed by western blotting  
114 (Supplementary Fig. 1a) and immunofluorescence analyses (Supplementary Fig. 1b). The impact of all  
115 29 viral proteins on three major branches of innate immunity: IFN/pro-inflammatory cytokine induction  
116 via RLRs (Fig. 1b, Supplementary Fig. 1c), signalling (Fig. 1c, Supplementary Fig. 1d) and autophagy  
117 (Fig. 1d, Supplementary Fig. 1e) was analysed by quantitative reporter assays.

118 Induction of type I IFNs (IFN- $\alpha$  and IFN- $\beta$ ) was monitored using a Firefly luciferase reporter controlled  
119 by the full IFN- $\alpha$ 4 promoter, the full IFN- $\beta$  promoter, or isolated binding sites for the transcription  
120 factors IRF3 or NF- $\kappa$ B (Fig. 1b). All assays were normalized for cell viability (Supplementary Fig. 1f).  
121 HEK293T cells were infected with Sendai Virus, mimicking RLR activation by SARS-CoV-2. Nsp2,  
122 Nsp6 and Nsp12 slightly enhanced both IFN- $\alpha$ 4 and IFN- $\beta$  promoter induction as well as IRF3-  
123 dependent transcription (Fig. 1b). However, our analyses revealed that Nsp1, Nsp3, Nsp5, Nsp10,

124 Nsp13, ORF6 and ORF7b are the major SARS-CoV-2 encoded antagonists of type I IFN induction  
125 (Fig. 1b).

126 Treatment with type I and III IFNs, such as IFN- $\alpha$ , IFN- $\beta$  and IFN- $\lambda$ 1 culminates in the induction of  
127 genes with IFN response element (ISRE)-containing promoters<sup>16</sup>. Type II IFN- $\gamma$  causes gene activation  
128 of gamma activated sequence (GAS) containing promoters. Pro-inflammatory cytokine signalling  
129 (TNF $\alpha$  and IL-1 $\alpha$ ) induces genes containing NF- $\kappa$ B sites in the promoter. Signalling of type I IFNs  
130 (IFN- $\alpha$  and IFN- $\beta$ ), type II IFN (IFN- $\gamma$ ), type III IFN (IFN- $\lambda$ 1) and pro-inflammatory cytokine  
131 signalling (TNF $\alpha$  and IL-1 $\alpha$ ) was quantified using quantitative Firefly luciferase reporters controlled  
132 by the respective promoters (Fig. 1c). Stimulation with IFN- $\alpha$ 2 and IFN- $\beta$  (Fig. 1c) revealed that  
133 activation of the ISRE promoter is strongly repressed by Nsp1, Nsp5, Nsp13, Nsp14, ORF6 and ORF7b.  
134 A similar set of viral proteins interfered with type II IFN- $\gamma$  and type III IFN- $\lambda$ 1 signalling, albeit much  
135 weaker (mean inhibition 18% and 35%, respectively) compared to type I IFN signalling (mean  
136 inhibition 78% for IFN- $\alpha$ 2 and 53% for IFN- $\beta$ ). Activation of NF- $\kappa$ B signalling by TNF $\alpha$  or IL-1 $\alpha$  was  
137 potently inhibited by the SARS-CoV-2 Nsp1, Nsp5, Nsp15, ORF3a, E, M, ORF6 and ORF7b proteins.  
138 These analyses revealed that a similar set of proteins (Nsp1, Nsp5, Nsp15, ORF3a, E, M, ORF6 and  
139 ORF7b) antagonises pro-inflammatory cytokine induction and signalling.

140 Since induction of autophagy does not depend on *de novo* gene expression<sup>41</sup>, we monitored autophagy  
141 levels in SARS-CoV-2 protein expressing HEK293T cells by membrane-association of stably expressed  
142 GFP-LC3B, a hallmark of autophagy induction (Fig. 1d, Supplementary Fig. 1e)<sup>42</sup>. Autophagosome  
143 numbers under basal conditions were strongly increased in the presence of ORF3a, E, M and ORF7a,  
144 suggesting either *de novo* induction of autophagy or blockage of turnover (Fig. 1d). Upon induction of  
145 autophagy using Rapamycin, a similar pattern was observed. To clarify whether these viral proteins  
146 induce autophagy or block turnover, leading to accumulation of GFP-LC3B positive vesicles, we treated  
147 cells with saturating amounts of Bafilomycin A1, which inhibits autophagic turnover. The increase of  
148 autophagosome numbers by ORF3a, E, M and ORF7a was drastically reduced compared to non-  
149 blocking conditions (Fig. 1d), indicating that these proteins block turnover, rather than induce it.  
150 Blockage of autophagy and co-expression of Nsp1 and Nsp14 induced cell death, which may be

151 responsible for the low number of autophagosomes. Unexpectedly, in the presence of Nsp15  
152 autophagosome numbers were consistently reduced, suggesting that it inhibits autophagy (Fig. 1d).

153 Taken together, our analysis reveals that SARS-CoV-2 encodes multiple proteins that strongly  
154 antagonise innate immunity. Notably, there are differences in overall inhibition of the pathways with  
155 IFN- $\gamma$  and IFN- $\lambda$ 1 signalling being only weakly antagonised. Furthermore, autophagy turnover is  
156 strongly blocked by E, M, ORF3a and ORF7a, thus autophagic degradation is avoided.

### 157 **SARS-CoV-2 proteins target innate immunity at multiple levels**

158 Our analyses revealed that IFN- $\beta$  signalling as well as autophagy are strongly counteracted by multiple  
159 SARS-CoV-2 proteins. Therefore, we aimed at identifying the steps that are targeted in these pathways.  
160 We focused on the top 5 inhibitors as identified in Fig. 1b-d. Nsp1 was removed from the analysis as it  
161 prevents translation in general<sup>30</sup>. To analyse IFN- $\beta$  signalling, we monitored the levels of the type I IFN  
162 receptor, IFNAR using western blotting in HEK293T cells overexpressing Nsp5, Nsp13, Nsp14, ORF6  
163 or ORF7b. Activation of the two major transcription factors of type I IFN signalling, STAT1 and  
164 STAT2 (Fig. 2a), was examined by phosphorylation status. Basal STAT1 and STAT2 levels were not  
165 significantly affected by all proteins tested (Fig. 2b, quantification in Supplementary Fig. 2a-c). (Fig.  
166 2b). In the presence of Nsp5, activated STAT1 and to a lesser extent STAT2 accumulated (Fig. 2b and  
167 2d, Supplementary Fig. 2a). ORF6 and ORF7b neither affect IFNAR levels nor STAT1 expression nor  
168 activation (Fig. 2b-d). This agrees with recent reports<sup>26,43,44</sup> suggesting that ORF6 instead prevents  
169 trafficking of transcription factors. In the presence of Nsp14 and to a lesser extent Nsp13, endogenous  
170 levels of IFNAR were prominently reduced (Fig. 2b, c). Consequently, phosphorylation of STAT1 was  
171 decreased upon Nsp14 co-expression (Fig. 2b, d).

172 Upon activation of autophagy, cytoplasmic MAP1LC3B (LC3B) is proteolytically processed and  
173 lipidated (LC3B-II) to decorate autophagosomal membranes<sup>41,42</sup>. Upon fusion of autophagosomes with  
174 lysosomes, the autophagic receptor p62 is degraded (autophagy turnover, Fig. 2e). We analysed the  
175 effect of the top 5 autophagy modulating SARS-CoV-2 proteins: Nsp15, ORF3a, E, M and ORF7a (Fig.  
176 1d) on autophagy markers. Levels of Beclin-1 and ULK1, which are part of the core machinery of

177 autophagy initiation<sup>45,46</sup>, remained constant (Fig. 2f, Supplementary Fig. 2d and 2e). Overexpression of  
178 Nsp15 led to a very slight decrease of LC3B-II but accumulation of p62, suggesting that Nsp15 blocks  
179 induction of autophagy (Fig. 2f and 2g-h). In line with this, the number of GFP-LC3B-puncta  
180 (=autophagosomes) per cell in HeLa-GFP-LC3B cells was reduced upon Nsp15 expression to almost 0  
181 (Fig. 2i, j). In the presence of ORF3a, E and ORF7a, the levels of processed LC3B (LC3B-II) were 4-  
182 to 7-fold increased (Fig. 2g), and p62 levels were approximately 1.5-fold increased (Fig. 2h). This  
183 indicates that these three viral proteins block autophagic turnover. Consequently, the number of  
184 autophagosomes was 10-fold increased upon ORF3a, E, M or ORF7a expression (Fig. 2i, j). Curiously,  
185 while accumulation of LC3B-II indicated that M blocks autophagic turnover or induces autophagy, the  
186 levels of p62 were not significantly altered in the presence of M (Fig. 2f, h). Notably, overexpression  
187 of M resulted in an accumulation of LC3B in the perinuclear space, whereas for all other viral proteins  
188 autophagosomes were normally distributed (Fig. 2i, j).

189 Taken together, our data demonstrates that SARS-CoV-2 synergistically targets innate immune  
190 activation. The major type I IFN antagonists Nsp5, Nsp13, Nsp14, ORF6 and ORF7b block the  
191 signalling cascade at different levels. E, ORF3a and ORF7a use similar mechanism to block autophagic  
192 turnover, while M may have evolved a different mechanism and Nsp15 inhibits *de novo* autophagy  
193 induction.

#### 194 **ORF3a and ORF7a perturb the late-endosomal/trans-Golgi network**

195 Our data showed that ORF3a and ORF7a are potent autophagy antagonists of SARS-CoV-2 (Fig. 1d,  
196 Fig. 2f-j). To determine their molecular mechanism(s), we performed proteome analysis of HEK293T  
197 cells overexpressing SARS-CoV-2 ORF3a and ORF7a (Supplementary Fig. 3a). As a control, we used  
198 S, Nsp1 and Nsp16 overexpressing cells which show little to no effect on autophagy (Fig. 1d). In  
199 addition, we analysed the proteome of Caco-2 cells infected with SARS-CoV-2 for 24 or 48 h. Fold  
200 changes compared to vector transfected or non-infected controls were calculated (Fig. 3a, b,  
201 Supplementary Fig. 3b-e, Supplementary Table 1). Analysis of the data revealed that in the presence of  
202 Nsp1, cellular proteins with a short half-life were markedly reduced (Supplementary Fig. 3f)<sup>47</sup>. This  
203 supports our previous finding that Nsp1 globally blocks translation<sup>30</sup> and confirms the validity of the



204 proteome analysis. PANTHER-assisted Gene Ontology Analysis of the proteins regulated more than 4-  
205 fold by the overexpression of individual SARS-CoV-2 proteins revealed that ORF3a and ORF7a target  
206 the late endosome pathway (GO:0005770) (Fig. 3c, Supplementary Table 2). A similar analysis for the  
207 SARS-CoV-2 samples showed that the late endosome pathway is also affected during the genuine  
208 infection. Thus, we had a closer look at the subcellular localisation of ORF3a and ORF7a and their  
209 effect on intracellular vesicles. In line with the proteome analysis, ORF7a and ORF3a both localised to  
210 the late endosomal compartment, co-localising with the marker Rab9 (Fig. 3d, e). In contrast,  
211 localisation to Rab5a-positive early endosomes was not apparent (Supplementary Fig. 3g). Disturbance  
212 of the integrity of the trans-Golgi network (TGN) at the interface with the late endosomes<sup>48,49</sup> by viral  
213 proteins is a well-known strategy to block autophagy<sup>50</sup>. Immunofluorescence analysis revealed that the  
214 localisation of ORF3a or ORF7a partially overlapped with a TGN marker ( $R = 0.5$ , Fig. 3g) indicating  
215 close proximity. ORF6, which is known to localise to the Golgi apparatus<sup>43</sup>, was used as a positive control  
216 ( $R=0.7$ ). Nsp8, which displayed a cytoplasmic localisation, was used as a negative control ( $R=0.3$ ).  
217 Importantly, analysis of free TGN-marker positive vesicles in SARS-CoV-2 ORF3a or ORF7a  
218 expressing cells revealed that both viral proteins cause significant fragmentation of the TGN (Fig. 3f,  
219 h).

220 These data indicate that both ORF3a and ORF7a disturb the proteome at the late endosomes eventually  
221 causing the TGN to fragment, which ultimately leads to a block of autophagic turnover<sup>49-52</sup>.

## 222 **SARS-CoV-2 Nsp15 is less potent in innate immune antagonism than SARS-CoV-1 Nsp15**

223 To examine the conservation of innate immune antagonism, we functionally compared Nsp1, Nsp3,  
224 Nsp7, Nsp15, M, N, ORF3a, ORF6 and ORF7a of SARS-CoV-2, the closest related CoV, RaTG13-  
225 CoV and the previous highly pathogenic SARS-CoV-1. RaTG13-CoV was isolated from the  
226 intermediate host horseshoe bats (*Rhinolophus affinis*)<sup>3</sup>. The amino acid sequences of the different  
227 CoVs are largely conserved, with the exception of Nsp3, ORF3a and ORF6 (Fig. 4a), and were all  
228 expressed as confirmed by western blotting (Supplementary Fig. 4a-i). Rabies virus P protein<sup>53-55</sup>,  
229 Measles virus V protein<sup>56-58</sup> and TRIM32<sup>59,60</sup> expression served as positive controls. Overall, proteins  
230 of SARS-CoV-1 and RaTG13-CoV behave similar to their SARS-CoV-2 counterparts, suggesting that

231 many functions are conserved. Importantly, however, this is not the case for Nsp15, Nsp3 and to a lesser  
232 extend ORF6 (Fig. 4a-c). SARS-CoV-1 ORF6 is about 4-fold less potent in antagonising type I IFN  
233 signalling (Fig. 4b) but induces higher levels of autophagy (Fig. 4c). However, expression levels of  
234 SARS-CoV-1 ORF6 were also higher than that of its SARS-CoV-2 and RaTG13-CoV counterparts  
235 (Supplementary Fig. 4g), which may explain the differences in activity. Significant differences between  
236 SARS-CoV, RaTG13-CoV and SARS-CoV-2 Nsp3 were reanalysed in a dose-dependent manner,  
237 however the differences are only in the range of 2-3-fold (Supplementary Fig. 4j).

238 The most striking, statistically significant difference was observed for Nsp15. SARS-CoV-1 Nsp15 is  
239 over 10-fold more potent in suppression of type I IFN induction and signalling than RaTG13-CoV and  
240 SARS-CoV-1 Nsp15 (Fig. 4a, b). Notably, expression levels of SARS-CoV-2, RaTG13-CoV and  
241 SARS-CoV-1 Nsp15 were similar, with SARS-CoV-1 Nsp15 even slightly less expressed  
242 (Supplementary Fig. 4c). Notably, all Nsp15 variants still inhibited autophagy equally (Fig. 4c).  
243 Analysis of the dose-dependent effect of SARS-CoV-2 Nsp15, RaTG13-CoV Nsp15 and SARS-CoV-  
244 1 Nsp15 on type I IFN induction (Fig. 4d) and signalling (Fig. 4e) showed that on average SARS-CoV-  
245 2 Nsp15 performed 32-fold worse than SARS-CoV-1 Nsp15, and RaTG13-CoV Nsp15 inhibited type  
246 I IFN induction 7.8-fold less (Fig. 4d). Similarly, SARS-CoV-1 Nsp15 outperformed RaTG13-CoV and  
247 SARS-CoV-2 Nsp15 by 15- and 5.7-fold, respectively, in inhibition of type I IFN signalling (Fig. 4e).

248 Taken together, this data indicates, that while most IFN antagonist activities are conserved between  
249 SARS-CoV-1, RaTG13-CoV and SARS-CoV-2, there is a major exception: Nsp15 of SARS-CoV-2  
250 was considerably less potent than SARS-CoV-1 Nsp15 in counteracting both IFN- $\beta$  induction and  
251 signalling.

## 252 **Inefficient antagonism by SARS-CoV-2 proteins is predictive for efficient immune control**

253 Our analyses revealed that several of the 29 SARS-CoV-2 proteins synergistically antagonise innate  
254 immune activation (Figs. 1-4), albeit with different efficiency. The mean inhibition of IFN- $\gamma$  and IFN-  
255  $\lambda 1$  signalling was only 18% and 35%, respectively, compared to type I IFN signalling with a mean  
256 inhibition of 78% for IFN- $\alpha 2$  and 53% for IFN- $\beta$ . Consequently, we assessed whether IFN- $\alpha 2$ , IFN- $\beta$ ,

257 IFN- $\gamma$  and IFN- $\lambda$ 1 have a different impact on SARS-CoV-2 (Fig. 5a, Supplementary Fig. 5a, b).  
258 Treatment with the type I IFN- $\alpha$ 2 was the least efficient. In contrast, at the same concentration IFN- $\gamma$   
259 (500 U/ml) reduced viral RNA in the supernatant almost 300-fold more efficiently. All agents caused  
260 little if any cytotoxic effects (Supplementary Fig. 5c). Altogether, we observed a good correlation ( $r=$   
261 0.89) between average inhibition of the respective signalling pathway (Fig. 1c) antagonised by the 29  
262 SARS-CoV-2 proteins and IFN susceptibility at 5 U/ml (Fig. 5b). Thus, our results indicate that the  
263 overall efficiency of SARS-CoV-2 proteins in counteracting specific IFN signalling pathway is  
264 predictive for the overall antiviral potency of different types of IFNs.

### 265 **Rational combination allows highly effective innate control of SARS-CoV-2**

266 IFN therapy is commonly associated with significant adverse effects, due to inflammation. To minimize  
267 detrimental pro-inflammatory effects of IFNs, doses required for efficient viral restriction should be  
268 reduced. Thus, we analysed the impact of the most potent IFNs, IFN- $\gamma$  and IFN- $\lambda$ 1, and their  
269 combination on SARS-CoV-2 replication. To mimic prophylactic and therapeutic treatment, we  
270 examined pre-treatment for 24 h before infection with SARS-CoV-2 and treatment 6 h post-infection.  
271 Overall, the effects of IFN treatment were about 10-fold stronger in the prophylactic condition than in  
272 the therapeutic treatment but consistent (Fig. 5c, d). Expression analysis of SARS-CoV-2 S and N  
273 confirmed the qPCR results, and equal GAPDH levels show no cytotoxicity (Fig. 5d). While treatment  
274 with a single dose of IFN- $\gamma$  and IFN- $\lambda$ 1 alone reduced viral RNA production 50-100-fold, the  
275 combinatorial treatment at the same concentration synergistically potentiated the effect to about 1000-  
276 fold reduction in SARS-CoV-2 RNA (Fig. 5c).

277 To further decrease inflammatory side-effects by IFN treatment, anti-inflammatory pathways like  
278 autophagy could be induced<sup>61-63</sup>. Treatment with Rapamycin, which induces autophagy, already  
279 reduced viral replication to a maximum of 4-6-fold on its own at 125 nM (Supplementary Fig. 5d, e).  
280 Bafilomycin A1, which blocks autophagy, had little to no effects. Both drugs only marginally affected  
281 cell survival at the used concentrations (Supplementary Fig. 5f). Treatment of Rapamycin (125 nM) in  
282 combination with either IFN- $\gamma$  or IFN- $\lambda$ 1 was found to be additive (Fig. 5c, d). Triple treatment with  
283 IFN- $\gamma$ , IFN- $\lambda$ 1 and Rapamycin showed the most potent anti-viral effect of all combinations for pre-

284 treatment and post-treatment, reducing viral RNA in the supernatant by ~2100-fold and ~86-fold,  
285 respectively (Fig. 5c).

286 In summary, our data shows that the anti-SARS-CoV-2 effect of combinatorial treatments of IFN- $\gamma$ ,  
287 IFN- $\lambda$ 1 are synergistic. Additional anti-inflammatory autophagy activation by Rapamycin even further  
288 decreased SARS-CoV-2 replication. This suggests that concerted activation of innate immunity may be  
289 an effective anti-viral approach ensuring low inflammation.

## 290 **DISCUSSION**

291 Viruses drastically alter our innate immune defences to establish an infection and propagate to the next  
292 host<sup>13,14,21,27,43,64</sup>. Our data reveal the extent of immune manipulation SARS-CoV-2 employs. We  
293 determined the major antagonists of type I, type II and type III IFN induction and signalling as well as  
294 pro-inflammatory NF- $\kappa$ B activity encoded by SARS-CoV-2 (Nsp1, Nsp5, Nsp13, Nsp14, ORF6 and  
295 ORF7b). In addition, autophagy is majorly targeted by Nsp15, ORF3a, E, M and ORF7a. Subsequent  
296 mechanistic studies revealed that SARS-CoV-2 proteins synergistically block innate immune induction  
297 at various levels. We could reveal for the first time, that Nsp14 lowers the cellular levels of the IFN  
298 receptor, IFNAR, consequently preventing activation of the crucial transcription factors STAT1 and  
299 STAT2. Both ORF3a and ORF7a cause fragmentation of the TGN via disturbing the late endosomal  
300 pathway. This is a common strategy of viruses to block autophagic turnover<sup>50</sup>. Examination of the  
301 functional conservation showed that SARS-CoV-2 Nsp15 was less efficient in blocking innate immune  
302 activation, both type I IFN induction and signalling, than SARS-CoV-1 Nsp15. This may ultimately  
303 cause SARS-CoV-2 to be better controlled by the innate immune system than SARS-CoV, impacting  
304 the number of subclinical infections and eventually facilitate efficient spread. Thus, our data suggests  
305 that differences in innate immune antagonism by Nsp15 could have contributed to the rapid spread of  
306 SARS-CoV-2. Overall, the combined analysis of IFN antagonism allowed us to deduce that treatment  
307 with IFN- $\gamma$  and IFN- $\lambda$ 1 is most efficient against SARS-CoV-2. On top of that, combinatorial treatment  
308 of SARS-CoV-2 with these two IFNs and anti-inflammatory autophagy induction potentiated the effects  
309 of the individual treatments. This may pave the way for future anti-viral therapies against SARS-CoV-  
310 2 based on rational immune activation.

311 Why would multiple effective proteins target the same pathway? For example, type I IFN signalling  
312 could have been shut down by Nsp1, Nsp5, Nsp13, Nsp14, ORF6 and ORF7b alone, each reducing the  
313 activation of the innate immune pathways to below 10%. However, our assays revealed (Figs. 1-3) that  
314 the targeting mechanisms are often not redundant and may act synergistically. This could allow the  
315 virus to better control the targeted pathway, thus minimising the effect of the signalling on its  
316 replication. In addition, a viral protein majorly targeting one pathway may affect other connected  
317 immune pathways at once. For example, disturbance of the kinase TBK1 activation may affect primarily  
318 IFN induction and to a lesser extent also impact autophagy<sup>65</sup>. Proteome analyses revealed the late  
319 endosome/Golgi network as a target of ORF3a and ORF7a. Our data suggests, that both ORF3a and  
320 ORF7a of SARS-CoV-2 cause fragmentation of the Golgi apparatus and thus likely blockage of  
321 autophagy. SARS-CoV-1 ORF3a was previously implicated in Golgi fragmentation<sup>51,66</sup>. Notably,  
322 fragmentation of the Golgi is for example triggered by Hepatitis C virus to block anti-viral autophagic  
323 turnover<sup>50</sup> and may represent a common strategy by viruses to avoid autophagic degradation. Based on  
324 our initial proteome approaches, future studies will see more mechanistic data to explain the molecular  
325 details of the impact of SARS-CoV-2 proteins on innate immune activation. Notably, several proteins  
326 including ORF6, ORF3a, ORF7a, M and E, accumulate at the Golgi network or in perinuclear spaces,  
327 alluding to the emerging role of the Golgi as a hub for immune manipulation<sup>52,67</sup>.

328 Our results demonstrate that ORF6, ORF3a, ORF7a and ORF7b are the strongest innate immune  
329 antagonists among the accessory genes of SARS-CoV-2 (Fig. 1). Besides the accessory genes, which  
330 classically encode immune antagonists, a surprising number of non-structural proteins manipulate  
331 innate immunity. Nsp1, which targets cellular translation and thus broadly inhibits any response  
332 dependent on cellular translation, including IFN induction and expression of ISGs<sup>30</sup>. However, Nsp3,  
333 Nsp5, Nsp13 and to a lower extent Nsp15 also antagonised IFN induction and signalling (Fig. 1). These  
334 non-structural proteins of CoVs have important functions in the viral life-cycle: Nsp3 as ISG/ubiquitin  
335 ligase and protease for autocatalytic processing of the ORF1a/b precursor protein<sup>68-70</sup> Nsp5 as a protease  
336 mediating cleavage of the precursor polyproteins<sup>71,72</sup>, Nsp13 as NTPase/Helicase<sup>73,74</sup> and Nsp15 as  
337 endoribonuclease<sup>75</sup>. So far it is not completely clear how their enzymatic functions may impact their

338 activity against innate immunity. Except for Nsp3, as its function as a de-ISGlase may inactivate the  
339 transcription factor IRF3 and thus reduce IFN induction<sup>70</sup>. According to our analysis the structural  
340 proteins E and M strongly manipulated autophagy (Fig. 1d). This suggests that the incoming virion may  
341 already block autophagic turnover to prevent their own degradation by autophagy.

342 However, while we may detect most counteraction strategies, our screening approach may miss immune  
343 evasion strategies employed by SARS-CoV-2. For example, many non-structural proteins form  
344 complexes, that are not present during single overexpression and may only be functional as a full  
345 assembly. Evasion mechanisms based on RNA structures and sequences will not be identified due to  
346 the usage of codon-optimized expression plasmids. Finally, the virus itself may employ strategies to  
347 hide itself from recognition, not activating innate immune defences in the first place. One example is  
348 the capping of its genomic and subgenomic mRNAs, which removes the free triphosphate 5' end.

349 Our analyses further revealed that the human innate immune antagonism is largely conserved in an  
350 animal CoV isolate that is sequentially closest related to SARS-CoV-2, RaTG13-CoV<sup>1,76</sup> (Fig. 4). This  
351 indicates that the virus from horseshoe bats is capable of counteracting the human immune defences,  
352 which may have facilitated successful zoonotic transmission from bats eventually to humans. Currently,  
353 the intermediate animal host of SARS-CoV-2 is under debate<sup>3,76-78</sup>, however it is likely, that the virus  
354 isolated from it is even closer related to SARS-CoV-2 than RaTG13-CoV. Thus, any immune evasion  
355 mechanisms conserved between SARS-CoV-2 and RaTG13-CoV, is likely to be conserved in the direct  
356 progenitor virus of SARS-CoV-2. The previous epidemic and related human SARS-CoV-1 and the  
357 current pandemic SARS-CoV-2 differ in susceptibility towards IFNs with SARS-CoV-1 being more  
358 resistant<sup>26</sup>. Furthermore, infection with SARS-CoV-2 is often asymptomatic and likely controlled by  
359 the host<sup>26</sup> as lower mortality rates and higher subclinical infections suggest<sup>4</sup>. Paradoxically, this may  
360 support the fast spread and 'success' of the virus. Thus, SARS-CoV-2 may have found the 'perfect'  
361 balance. Intermediate immune evasion and consequently intermediate pathogenicity to support spread,  
362 but not kill the host. Our data shows that SARS-CoV-2 Nsp15 is strikingly less efficient in IFN  
363 evasion than Nsp15 of SARS-CoV. These data are the first mechanistic evidence why SARS-CoV-1 is

364 less susceptible towards IFN treatment than SARS-CoV-2. It may be tempting to speculate that common  
365 cold CoVs counteract the innate immune system less efficiently than SARS-CoV-2.

366 Our analysis indicates that during a SARS-CoV-2 infection less cytokines than expected are released,  
367 autophagic turnover is blocked and general immune activation is perturbed. This is supported by a large  
368 amount of data from COVID19 patients<sup>24–28,43,70,79–81</sup>. However, an important question remains: Why  
369 are some innate immune pathways, such as IFN- $\gamma$  signalling less antagonised (Fig. 1)? Are the viral  
370 immune manipulation strategies ineffective? Indeed, IFN- $\gamma$  is the most potent IFN against SARS-CoV-  
371 2 we and others tested<sup>80</sup> (Fig. 5). One possible explanation would be that there was no need for the virus  
372 to antagonise them. Indeed, in COVID19 patients and *in vitro* infections with SARS-CoV-2, IFN- $\gamma$   
373 levels are surprisingly low<sup>28,81</sup>. Furthermore, despite high IFN- $\gamma$  levels being a hallmark of cytokine  
374 storms induced by influenza viruses, the SARS-CoV-2 cytokine storm only has low IFN- $\gamma$  levels and  
375 decreased IFN- $\gamma$  expression in CD4+ T cells is associated with severe COVID19<sup>4,82,83</sup>. It is tempting to  
376 speculate that T-cells which confer pre-existing immunity against SARS-CoV-2<sup>84,85</sup> could, upon  
377 activation, release IFN- $\gamma$ , whose innate immune signalling may also contribute to increased clearance  
378 of the infection. Strikingly, our work shows that analysis of the innate antagonism may be predictive  
379 for therapeutic opportunities.

380 Severe side effects due to high and constant inflammation are prevalent for treatments with IFNs<sup>35–37</sup>.  
381 However, these side-effects are dose-dependent<sup>86</sup>. Thus, minimizing the dose required for treatment is  
382 paramount. Our data indicates that effects of treatment with multiple IFNs is additive but synergistic  
383 and potentiates each other (Fig. 5). Therefore, a promising anti-viral approach may be a combinatorial  
384 treatment of different cytokines, effectively also reducing the burden of side-effects. The side effects of  
385 IFN therapy are mainly caused by inflammation. Combined with anti-inflammatory approaches such as  
386 autophagy activation by Rapamycin<sup>62,63</sup>, this approach may even be more successful, as our *in vitro* data  
387 suggests. Future studies are highly warranted to study rational, concerted innate immune activation  
388 against SARS-CoV-2 *in vivo*. These studies may eventually pave the way for novel therapies, which  
389 may not only work against SARS-CoV-2, but also against other pathogenic viruses, including  
390 potentially future CoVs.

391 In summary, our results reveal the extend of innate immune manipulation of SARS-CoV-2. The  
392 comparison of innate antagonism of SARS-CoV-2 to SARS-CoV-1 revealed that mutations in Nsp15  
393 may be responsible for the higher susceptibility of SARS-CoV-2 against IFNs. Finally, our data allowed  
394 us to deduce the most effective IFNs against SARS-CoV-2 and combinatorial treatments even further  
395 minimized the doses of the individual cytokines required.

396

#### 397 **AUTHOR CONTRIBUTIONS**

398 L.K., M.Hi., M.Ha. performed the majority of the experimental work with help from J.H.S.,  
399 S.K. and C.B.P.. R.N. performed experiments with infectious SARS-CoV-2 assisted by F.Z..  
400 C.M.S. and S.S. generated expression constructs. J.A.M. and C.C. performed the SARS-CoV-  
401 2 infection for the proteome analysis. A.I., I.F. and W.A performed the proteome analyses and  
402 the bioinformatic interrogation of the data. J. M., D.S., A.I., S.S. and K-K.C. provided  
403 resources and comments for the manuscript. K.M.J.S and F.K. conceived the study, planned  
404 experiments and wrote the manuscript. All authors reviewed and approved the manuscript.

405

#### 406 **ACKNOWLEDGEMENTS**

407 We thank Regina Burger, Susanne Engelhart, Daniela Krnavek, Kerstin Regensburger, Martha  
408 Meyer, Birgit Ott and Nicola Schrott for excellent technical assistance. We would like to  
409 especially acknowledge the library of SARS-CoV-2 expression plasmids which was  
410 generously given to us by Nevan Krogan (University of California, San Francisco). This study  
411 was supported by DFG grants to F.K., J.M., K.M.J.S., D.Sa., A.I. and KKC (CRC1279,  
412 SPP1923, SP1600/4-1, CRC1309, Project-ID 369799452 - TRR237), EU's Horizon 2020  
413 research and innovation program to J.M. (Fight-nCoV, 101003555), a COVID-19 research  
414 grant of the Federal Ministry of Education and Research (MWK) Baden-Württemberg (to D.S.



415 and F.K.) as well as the BMBF to F.K., D.Sa. and K.M.J.S. (Restrict SARS-CoV-2, protACT  
416 and IMMUNOMOD).

#### 417 **DECLARATIONS OF INTERESTS**

418 The authors declare no competing interests.

419

#### 420 **FIGURE LEGENDS**

##### 421 **Figure 1: Systematic analysis of innate immune antagonism by SARS-CoV-2 proteins. a,**

422 Schematic depiction of the 30 SARS-CoV-2 encoded proteins in the order they appear in the  
423 genome. The polyprotein ORF1a(b) is (auto)proteolytically cleaved into 16 non-structural  
424 proteins (Nsp, turquoise). The structural proteins (yellow) are Spike (S), Membrane (M),  
425 envelope (E) and nucleoprotein (N). The set is complemented by the accessory proteins (red)  
426 ORF 3a, 3b, 3c, 6, 7a, 7b, 8, 9b, 9c and 10. **b-d**, Schematic depiction of the assay setup (top  
427 panel) and heatmap (red = inhibition, blue = induction) depicting modulation of innate immune  
428 pathways by overexpression of indicated SARS-CoV-2 proteins. Stimuli of the immune  
429 pathways are indicated. (a, b) Readout by luciferase reporter gene assay (colour represents the  
430 mean of n=3) using indicated promoter constructs in HEK293T cells or (c) autophagosome  
431 measurement by quantification of membrane-associated GFP-LC3B in HEK293T-GFP-LC3B  
432 cells (colour represents the mean of n=4). The stimulated vector control is set to 100% (white).  
433 SeV, Sendai Virus. IFN, Interferon. NT, not treatment. Rapa, Rapamycin. BafA, Bafilomycin  
434 A1.

##### 435 **Figure 2: SARS-CoV-2 interferes with innate immunity at various levels. a,** Schematic

436 depiction of the type I IFN signalling pathway. **b**, Exemplary immunoblot analysis showing  
437 activation of type I IFN signalling markers using whole cell lysates (WCLs) of HEK293T cells  
438 expressing indicated proteins and stimulated with IFN- $\beta$  (1000 U/ml, 45 min). Blots were

439 stained with anti-pSTAT1, anti-STAT1, anti-pSTAT2, anti-STAT2, anti-IFNAR, anti-Strep II  
440 and anti-actin. **c**, Quantification of the band intensities in (b) for IFNAR normalized to the band  
441 intensities of actin. Bars represent mean of  $n=3\pm\text{SEM}$ . **d**, Quantification of the band intensities  
442 in (b) for phospho-STAT1 (pSTAT1) normalized to the band intensities of actin. Bars represent  
443 mean of  $n=3\pm\text{SEM}$ . **e**, Schematic depiction of autophagy. **f**, Exemplary immunoblot analysis  
444 showing autophagy activity markers using WCLs of HEK293T cells expressing indicated  
445 proteins. Blots were stained with anti-SQSTM1/p62, anti-LC3B-II, anti-Beclin-1, anti-ULK1,  
446 anti-Strep II and anti-actin. **g**, Quantification of the band intensities in (f) for LC3B-II  
447 normalized to the band intensities of actin. Bars represent mean of  $n=3\pm\text{SEM}$ . **h**, Quantification  
448 of the band intensities in (f) for p62 normalized to the band intensities of actin. Bars represent  
449 mean of  $n=3\pm\text{SEM}$ . **i**, Exemplary confocal laser scanning microscopy images of autophagy  
450 activation via GFP-LC3B (green) puncta formation. Indicated Strep II-tagged SARS-CoV-2  
451 proteins (red) were overexpressed in HeLa GFP-LC3B cells (green). CQ, Chloroquine (4 h 10  
452  $\mu\text{M}$ ) was used as a positive control. Nuclei, DAPI (blue). Scale bar, 25  $\mu\text{M}$ . **j**, Quantification  
453 by area of GFP-LC3B puncta divided by cell number from the images in (i). Bars represent the  
454 mean of  $n=38-100$  cells $\pm\text{SEM}$ .

455 **Figure 3: ORF3a and ORF7a disturb the trans-Golgi network/late endosome interface.**

456 **a**, Heatmap (red = downregulation, blue = upregulation) depicting the fold changes of cellular  
457 and viral proteins during overexpression of indicated single SARS-CoV-2 proteins in  
458 HEK293T cells or **b**, SARS-CoV-2 infection (MOI 1) of Caco-2 cells 24 or 48 h post infection  
459 as assessed by mass spectrometry. **c**, Scatter plots of log<sub>2</sub> fold enrichment and P-value of the  
460 GO-Term 'late endosome' in protein sets regulated more than 4-fold upon expression of  
461 indicated viral protein (a) or SARS-CoV-2 infection (b). **d**, Quantification of co-localisation  
462 by Pearson Correlation of Rab9 and indicated viral proteins in HeLa cells transiently  
463 transfected with the indicated viral protein and GFP-Rab9. Bars represent the mean of  $n=7-15$

464 cells $\pm$ SEM. **e**, Exemplary confocal microscopy images of HeLa cells transiently expressing  
465 indicated viral proteins (red) and a marker of late endosomes GFP-Rab9 (green). Cells were  
466 stained with anti-Strep II (red). Nuclei, DAPI (blue). Scale bar, 10  $\mu$ m. **f**, Exemplary confocal  
467 microscopy images of the quantification in (g) stained with anti-TGN46 (green) and anti-Strep  
468 II (red). Nuclei, DAPI (blue). Scale bar, 10  $\mu$ m. **g**, Pearson's correlation indicating co-  
469 localisation between TGN46 and the indicated viral proteins from the image in (f). Bars  
470 represent the mean of n=6 cells $\pm$ SEM. **h**, Quantification of non-Golgi associated vesicles per  
471 cell as puncta/cell of (f). Bars represent the mean of n=15-25 cells  $\pm$ SEM.

472 **Figure 4: Conservation of innate immune antagonism between SARS-CoV-2, RaTG13-**  
473 **CoV and SARS-CoV. a-c**, Immune activation of type I IFN induction (a), type I IFN signalling  
474 (b) or autophagy (c) in the presence of indicated proteins (Nsp1, Nsp3, Nsp7, Nsp15, M, N,  
475 ORF3a, ORF6, ORF7a) of SARS-CoV-2 (blue), RaTG13-CoV (purple) or SARS-CoV-1 (red)  
476 assessed by IFN- $\beta$ -promoter luciferase reporter gene assays stimulated with Sendai Virus (SeV,  
477 a). ISRE-promoter luciferase reporter gene assays stimulated with IFN- $\beta$  (1000 U/ml, b).  
478 Membrane-associated GFP-LC3B (c) (n=4 $\pm$ SEM). Vector induction set to 100% (black).  
479 Controls, RABV P, MeV V or TRIM32 (grey). Bars represent the mean of n=3 $\pm$ SEM (a,b) or  
480 n=4 $\pm$ SEM (c). **d**, Dose dependent effect of SARS-CoV-2, RaTG13-CoV or SARS-CoV-1  
481 Nsp15 expression on IFN- $\beta$  induction stimulated with SeV (24 h). Quantification by IFN- $\beta$   
482 promoter dependent luciferase reporter activity. Lines represent one individual replicate. **e**,  
483 Dose dependent effect of Nsp15 expression on IFN- $\beta$  signalling in HEK293T cells, stimulated  
484 with IFN- $\beta$  (1000 U/ml, 8 h). Quantification by ISRE promoter dependent luciferase reporter  
485 activity. Lines represent one individual replicate.

486 **Figure 5: Innate immune activation as an anti-viral approach. a**, SARS-CoV-2 N RNA in  
487 the supernatant of SARS-CoV-2 (MOI 0.05, 48h p.i.) infected Calu-3 cells that were left  
488 untreated and/or were treated with the indicated amounts of indicated IFNs or pro-

489 inflammatory cytokines as assessed by qPCR. Lines represent the mean of  $n=2\pm SD$ . **b**,  
490 Correlation between average inhibition of the indicated innate immune signalling pathway and  
491 impact on replication of SARS-CoV-2 after treatment with the respective cytokine.  $r$ , Pearson's  
492 correlation. **c**, SARS-CoV-2 N RNA in the supernatant of SARS-CoV-2 (MOI 0.05, 48h p.i.)  
493 infected Calu-3 cells that were left untreated and/or were treated with the indicated  
494 combinations of indicated IFNs (5 U/ml) or Rapamycin (125 nM) either 24 h before the  
495 infection (Pre-treatment) or 6 h post infection (Post-treatment). Dots represent individual  
496 experiments, line the mean. Fold reduction compared to control is indicated. **d**, Immunoblot  
497 analysis of the SARS-CoV-2 infection using the WCLs of Calu-3 cells in (c). Blots were  
498 stained with anti-SARS-CoV-2 S, anti-SARS-CoV-2 N, and anti-GAPDH.

499

## 500 MATERIAL AND METHODS

501 **Cell lines and cell culture and viruses.** HEK293T cells were purchased from American type  
502 culture collection (ATCC: #CRL3216). The construction of HEK293T GL cells and HeLa GL  
503 cells was reported previously<sup>42</sup>. These cell lines were cultivated in Dulbecco's Modified Eagle  
504 Medium (DMEM, Gibco) supplemented with 10% (v/v) fetal bovine serum (FBS, Gibco), 100  
505 U/ml penicillin (PAN-Biotech), 100 µg/ml Streptomycin (PAN-Biotech), and 2 mM L-  
506 glutamine (PANBiotech). Calu-3 (human epithelial lung adenocarcinoma, kindly provided and  
507 verified by Prof. Frick, Ulm University) cells were cultured in Minimum Essential Medium  
508 Eagle (MEM, Sigma) supplemented with 10% (v/v) FBS (Gibco) (during viral infection) or  
509 20% (v/v) FBS (Gibco) (during all other times), 100 U/ml penicillin (PAN-Biotech), 100 µg/ml  
510 Streptomycin (PAN-Biotech), 1 mM sodium pyruvate (Gibco), and 1x non-essential amino  
511 acids (Gibco). Vero E6 (*Cercopithecus aethiops* derived epithelial kidney cells, ATCC) cells  
512 were grown in Dulbecco's modified Eagle's medium (DMEM, Gibco) which was  
513 supplemented with 2.5% (v/v) fetal bovine serum (FBS, Gibco), 100 U/ml penicillin (PAN-

514 Biotech), 100 µg/ml Streptomycin (PAN-Biotech), 2 mM L-glutamine (PANBiotech), 1 mM  
515 sodium pyruvate (Gibco), and 1x non-essential amino acids (Gibco). All cells were cultured at  
516 37°C in a 5% CO<sub>2</sub>, 90% humidity atmosphere. Sendai Virus was a kind gift from Prof. Hans-  
517 Georg Koch, Institute for Biochemistry and Molecular Biology, University of Freiburg. Viral  
518 isolates BetaCoV/France/IDF0372/2020 (#014V-03890) and  
519 BetaCoV/Netherlands/01/NL/2020 (#010V-03903) were obtained through the European Virus  
520 Archive global.

521

522 **Expression constructs and plasmids.** pLVX-EF1alpha constructs containing all Strep II-  
523 tagged, codon optimized open reading frames (Orfs) of SARS-CoV-2 (control, Nsp1, Nsp2,  
524 Nsp3, Nsp4, Nsp5, Nsp6, Nsp7, Nsp8, Nsp9, Nsp10, Nsp11, Nsp12, Nsp13, Nsp14, Nsp15,  
525 Nsp16, S, ORF3a, ORF3c, E, M, ORF6, ORF7a, ORF7b, ORF8, N, ORF9b, ORF9c, and  
526 ORF10) were a kind gift by David Gordon and Nevan Krogan<sup>39</sup>. V5 tagged, codon optimized  
527 Orfs coding for Nsp1, Nsp3, Nsp7, Nsp15, M, N, ORF3a, ORF6, and ORF7a from SARS-  
528 CoV-2, RaTG13-CoV, and SARS-CoV-1 were synthesized by Twist Bioscience and subcloned  
529 into the pCG vector by restriction cloning using the restriction enzymes XbaI and MluI (New  
530 England Biolabs). Firefly luciferase reporter constructs harbouring binding sites for NF-κB or  
531 IRF3, ISRE or GAS sites, or the genomic promoter of IFNA4 or IFNB1 in front of the reporter  
532 were previously described<sup>56,87</sup>. The GAPDH\_PROM\_01 Renilla SP Luciferase construct was  
533 purchased from switchgear genomics. pCR3 constructs coding for FLAG-tagged Measles  
534 morbillivirus V (MeV V) protein or Rabies virus P (RABV P) protein were described  
535 previously<sup>56,88</sup>. pEGFP-N1\_hTRIM32<sup>89</sup> was a gift from Martin Dorf (Addgene, #69541), the  
536 Orf of TRIM32 was subcloned into the pIRES\_FLAG vector using Gibson assembly as  
537 previously described<sup>42</sup>.

538

539 **Transfections.** Plasmid DNA was transfected using either the TransIT-LT1 Transfection  
540 Reagent (Mirus) or Polyethylenimine (PEI, 1 mg/ml in H<sub>2</sub>O, Sigma-Aldrich) according to the  
541 manufacturers' recommendations or as described previously<sup>42,90</sup>.

542

543 **Luciferase assays.** HEK293T cells were transiently transfected with Firefly luciferase reporter  
544 constructs, Renilla luciferase control constructs, and constructs expressing CoV Orfs in 48-  
545 well plates using TransIT-LT1. One day post-transfection, the cells were stimulated with IFN-  
546  $\beta$  (1,000 U/ml, 8 h, Merck), IFN- $\alpha$ 2 (500 U/ml, 24 h, Sigma-Aldrich), IFN- $\gamma$  (400 U/ml, 24 h,  
547 Sigma-Aldrich), IFN- $\lambda$ 1 (100 ng/ml, 8 h, R&D Systems), IL-1 $\alpha$  (10 ng/ml, 24 h, R&D  
548 Systems), TNF $\alpha$  (25 ng/ml, 24 h, Sigma-Aldrich), or SeV (1:500, 24 h, kindly provided by  
549 Hans-Georg Koch, Freiburg). 8-24 h post-stimulation, the cells were lysed in passive lysis  
550 buffer and luciferase activities of the Firefly luciferase and Renilla luciferase were determined  
551 using the Dual-Glo Luciferase Assay System (Promega) and an Orion II Microplate  
552 Luminometer (Berthold). Cell viability of the transfected cells was measured using the  
553 CellTiter-Glo Luminescent Cell Viability Assay (Promega).

554

555 **Cell viability assay.** Calu-3 or HEK293T cells were treated with cytokines or autophagy  
556 modulating drugs or transiently transfected using TransIT-LT1. To measure metabolic activity,  
557 cells were lysed in passive lysis buffer and analyzed using the CellTiter-Glo Luminescent Cell  
558 Viability Assay (Promega) according to manufacturer's instructions and an Orion II Microplate  
559 Luminometer (Berthold).

560

561 **Autophagy quantification by flow cytometry.** The number of autophagosomes was  
562 quantified as previously described<sup>42</sup>, either in a basal state, or stimulated with Rapamycin (1  
563  $\mu$ M, Sigma) or Bafilomycin A1 (0.1  $\mu$ M, Santa Cruz Biotechnology). In brief, HEK293T cells

564 stably expressing GFP-LC3B (HEK293T GL) were transiently transfected using PEI. 48 h  
565 post-transfection, cells were harvested in PBS and treated for 20 min at 4 °C with PBS  
566 containing 0.05% Saponin. Non-membrane bound GFP-LC3B was washed out of the  
567 permeabilized cells using PBS (Gibco) twice, followed by fixation in 4% Paraformaldehyde  
568 (PFA, Santa Cruz Biotechnology). The fluorescence intensity of membrane associated GFP-  
569 LC3B was then quantified via flow cytometry (FACSCanto II, BD Biosciences). The GFP-  
570 LC3B mean fluorescence intensity of the control (baseline) was subtracted.

571

572 **Whole-cell lysates.** Whole-cell lysates were prepared by collecting cells in Phosphate-  
573 Buffered Saline (PBS). The cell pellet (500 g, 4 °C, 5 min) was lysed in transmembrane lysis  
574 buffer [50 mM HEPES pH 7.4, 150 mM NaCl, 1% Triton X-100, 5 mM  
575 ethylenediaminetetraacetic acid (EDTA)] by vortexing at maximum speed for 30 s. Cell debris  
576 were pelleted by centrifugation (20,000 g, 4 °C, 20 min) and the total protein concentration of  
577 the cleared lysates was measured using the Pierce BCA Protein Assay Kit (Thermo Scientific)  
578 according to manufacturer's instructions. The lysates were adjusted to the same protein  
579 concentration and stored at -20 °C.

580

581 **SDS-PAGE and immunoblotting.** SDS-PAGE and immunoblotting was performed using  
582 standard techniques as previously described<sup>42</sup>. In brief, whole cell lysates were mixed with 6x  
583 Protein Sample Loading Buffer (LI-COR, at a final dilution of 1x) supplemented with 15%  $\beta$ -  
584 mercaptoethanol (Sigma Aldrich), heated to 95 °C for 5 min, separated on NuPAGE 4-12%  
585 Bis-Tris Gels (Invitrogen) for 90 min at 100 V and blotted onto Immobilon-FL PVDF  
586 membranes (Merck Millipore). The transfer was performed at a constant voltage of 30 V for  
587 30 min. After the transfer, the membrane was blocked in 1% Casein in PBS (Thermo  
588 Scientific). Proteins were stained using primary antibodies against  $\beta$ -actin (1:10,000, AC-15,

589 Sigma), Strep II-tag (1:1,000, NBP2-43735, Novus), Strep II-tag (1:2,000, ab76949, abcam),  
590 GAPDH (1:1,000, 607902, Biologend), pSTAT1 (1:1,000, Y701, Cell Signaling Technology),  
591 STAT1 (1:1,000, 9172S, Cell Signaling Technology), pSTAT2 (1:1,000, Y690, Cell Signaling  
592 Technology), STAT2 (1:1,000, 4594S, Cell Signaling Technology), IFNAR1 (1:1,000,  
593 ab45172, abcam), p62 (1:1,000, GP62-N, ProGen), LC3 $\alpha/\beta$  (1:200, G-4, Santa Cruz  
594 Biotechnology), Beclin-1 (1:1,000, 3738S, Cell Signaling Technology), ULK1 (1:1,000,  
595 D8H5, Cell Signaling Technology), SARS-CoV-2 Nsp3 (1:1,000, GTX135614, GeneTex),  
596 FLAG-tag (1:5,000, M2, Sigma), V5-tag (1:1,000, D3H8Q, Cell Signaling Technology),  
597 SARS-CoV-2 (COVID-19) spike antibody (1:1000, 1A9, Biozol), SARS-CoV/SARS-CoV-2  
598 Nucleocapsid Antibody (1:1000, MM05, SinoBiological), and Infrared Dye labelled secondary  
599 antibodies (1:20,000, LI-COR IRDye), diluted in 0.05% Casein in PBS. Band intensities were  
600 quantified using Image Studio (LI-COR) and protein levels were normalized on  $\beta$ -actin or  
601 GAPDH levels.

602

603 **Immunofluorescence.** HeLa GL cells were transfected using TransIT-LT1 and grown on  
604 coverslips in 24-well plates. The cells were fixed using 4% PFA, and permeabilized and  
605 blocked with PBS containing 0.5% Triton X-100 (Sigma) and 5% FBS (Gibco). The cells were  
606 stained using primary antibodies against Strep II-tag (1:200, NBP2-43735, Novus), V5-tag  
607 (1:400, D3H8Q, Cell Signaling Technology), FLAG-tag (1:400, M2, Sigma) and TGN46  
608 (1:400, AHP500GT, Bio Rad), secondary antibodies fluorescently labelled with  
609 AlexaFluor568 targeting rabbit-IgGs (1:400, A10042, Invitrogen) and AlexaFluor647 targeting  
610 sheep-IgG (1:400, A21448, Invitrogen), and DAPI (1:1,000, Sigma) to stain nuclei. The  
611 coverslips were mounted on microscope slides using Mowiol mounting medium (10% (w/v)  
612 Mowiol 4-88, 25% (w/v) Glycerol, 25% (v/v) water, 50% (v/v) Tris-HCl 0.2 M pH 8.5, 2.5%  
613 (w/v) DABCO). Images were acquired using a Zeiss LSM710 and analysed with Fiji ImageJ.



614

615 **Autophagy quantification by counting.** HeLa GL cells were transfected using TransIT-LT1  
616 and grown on coverslips in 24-well plates. The cells were treated and stained for the transfected  
617 proteins as described in the Immunofluorescence method-paragraph. After acquiring images of  
618 30+ transfected cells, the total pixel area of GFP-LC3B puncta per cell was quantified using  
619 Fiji ImageJ as previously described<sup>42</sup>. In brief, the channels were separated to work with the  
620 GFP-channel, the background removed and smoothed, and a threshold was applied to isolate  
621 the GFP-LC3B puncta. By analysing the particles, the total area was determined. Cells treated  
622 with 1  $\mu$ M chloroquine overnight were used as positive control.

623

624 **RT-qPCR.** SARS-CoV-2 N (nucleoprotein) transcript levels were determined as previously  
625 described<sup>80,90</sup>. In brief, supernatants were collected from SARS-CoV-2 infected Calu-3 cells  
626 48 h post-infection. Total RNA was isolated using the Viral RNA Mini Kit (Qiagen, Cat#  
627 52906) according to the manufacturer's instructions. RT-qPCR was performed as previously  
628 described using TaqMan Fast Virus 1-Step Master Mix (Thermo Fisher, Cat#4444436) and an  
629 OneStepPlus Real-Time PCR System (96-well format, fast mode). Primers were purchased  
630 from Biomers (Ulm, Germany) and dissolved in RNase free water. Synthetic SARS-CoV-2-  
631 RNA (Twist Bioscience) or RNA isolated from BetaCoV/France/IDF0372/2020 viral stocks  
632 quantified via this synthetic RNA (for low Ct samples) were used as a quantitative standard to  
633 obtain viral copy numbers. (Forward primer (HKU-NF): 5'-TAA TCA GAC AAG GAA CTG  
634 ATT A-3'; Reverse primer (HKU-NR): 5'-CGA AGG TGT GAC TTC CAT G-3'; Probe  
635 (HKU-NP): 5'-FAM-GCA AAT TGT GCA ATT TGC GG-TAMRA-3'.

636

637 **Inhibition of SARS-CoV-2 by immune modulation.** 300,000 Calu-3 cells were seeded in 12-  
638 well plates. The cells were stimulated with increasing amounts of IFNs ( $\alpha$ 2,  $\beta$  and  $\gamma$ , 0.8, 4, 20,

639 100 and 500 U/ml or  $\lambda$ 1, 0.16, 0.8, 4, 20 and 100 ng/ml) at 24 h and 72 h post-seeding, with an  
640 intermediate medium change at 48 h post-seeding. 2 h after the second stimulation, the cells  
641 were infected with SARS-CoV-2 (MOI 0.05) and 6 h later the medium was changed. 48 h post-  
642 infection, the cells were harvested for further analysis.

643

644 **Propagation of SARS-CoV-2.** BetaCoV/Netherlands/01/NL/2020 and BetaCoV/  
645 France/IDF0372/2020 were obtained from the European Virus Archive. The viruses were  
646 propagated by infecting 70% confluent Vero E6 in 75 cm<sup>2</sup> cell culture flasks at a MOI of 0.003  
647 in 3.5 ml serum-free medium containing 1  $\mu$ g/ml trypsin. The cells were then incubated for 2  
648 h at 37 °C, before adding 20 ml medium containing 15 mM HEPES. Three days post-infection,  
649 the medium was exchanged and the supernatants were harvested 5 days post-infection upon  
650 visible cytopathic effect. The supernatants were cleared by centrifugation, aliquoted and stored  
651 at -80 °C. The infectious virus titre was determined as plaque forming units (PFU).

652

653 **Proteome analysis.** For the proteome analysis of infected cells, 0.6x10<sup>6</sup> Caco-2 cells were  
654 infected with SARS-CoV-2 BetaCoV/Netherlands/01/NL/2020 at an MOI of 0.5 and harvested  
655 24 h and 48 h post infection with WCL lysis buffer supplemented with 1:500 protease inhibitor.  
656 After centrifugation for 10 min with 14,000 rpm at 4 °C, the pellet was discarded. Then, the  
657 samples were boiled at 95 °C for 10 min to ensure denaturation. For the proteome analysis of  
658 single overexpressed SARS-CoV-2 proteins, 1x10<sup>7</sup> HEK293T cells were transfected with the  
659 respective constructs (pCG vectors containing V5-tagged, codon optimized Orfs of SARS-  
660 CoV-2 (Nsp1, Nsp16, S, ORF3a, ORF7a)). The cells were harvested in PBS and processed for  
661 LC-MS using the iST-kit (Preomics) as recommended by the manufacturer. For LC-MS  
662 purposes, desalted peptides were injected in a nanoElute system (Bruker) and separated in a  
663 25-cm analytical column (75  $\mu$ m ID, 1.6  $\mu$ m C18, IonOpticks) with a 100-min gradient from 2

664 to 37% acetonitrile in 0.1% formic acid. The effluent from the HPLC was directly  
665 electrosprayed into a hybrid trapped ion mobility-quadrupole time-of-flight mass spectrometer  
666 (timsTOF Pro, Bruker Daltonics, Bremen, Germany) using the nano-electrospray ion source at  
667 1.4 kV (Captive Spray, Bruker Daltonics). The timsTOF was operated at 100% duty cycle in  
668 data dependent mode to automatically switch between one full TIMS-MS scan and ten PASEF  
669 MS/MS scans in the range from 100–1700 m/z in positive electrospray mode with an overall  
670 acquisition cycle of 1.23 s. The ion mobility was scanned from 0.6 to 1.60 Vs/cm<sup>2</sup> with TIMS  
671 ion charge control set to 5e4, RF potential of 300 Vpp. The TIMS dimension was calibrated  
672 linearly using four selected ions from the Agilent ESI LC/MS tuning mix [m/z, 1/K0:  
673 (322.0481, 0.7318 Vs/cm<sup>2</sup>), (622.0289, 0.9848 Vs/cm<sup>2</sup>), (922.0097, 1.1895 Vs/cm<sup>2</sup>),  
674 (1221.9906, 1.3820 Vs/cm<sup>2</sup>)]. The mass spectrometry proteomics data have been deposited to  
675 the ProteomeXchange Consortium via the PRIDE partner repository with the dataset identifier  
676 PXD021899. MaxQuant 1.6.15.0 was used to identify proteins and quantify by LFQ with the  
677 following parameters: Database, Uniprot\_AUP000005640\_Hsapiens\_20200120.fasta  
678 supplemented with the sequences of NSP1\_V5, NSP7\_V5, NSP15\_V5, NSP16\_V5, E\_V5,  
679 M\_V5, N\_V5, S\_V5, ORF3\_V5, ORF6\_V5, ORF7\_V5 and Spike protein from SARSCoV2<sup>39</sup>;  
680 MS tol, 10ppm; MS/MS tol, 20ppm Da; Peptide FDR, 0.1; Protein FDR, 0.01 Min. peptide  
681 Length, 7; Variable modifications, Oxidation (M); Fixed modifications, Carbamidomethyl (C);  
682 Peptides for protein quantitation, razor and unique; Min. peptides, 1; Min. ratio count, 2. Raw  
683 data was analysed using R. Outliers (below 0.05 and above 0.95) appearing in more than 2  
684 cases were removed. Heatmaps were generated using R, using the inbuilt hierarchical  
685 clustering of heatmap.2 and displayed in Corel Draw.  
686

687 **GO Analysis.** From the proteome of the respective samples, proteins regulated more than 4-  
688 fold compared to the vector control were extracted and submitted to PANTHER (cellular  
689 component analysis).

690

691 **Half-life analysis.** We focused on the half-life comparisons to proteins for which we identified  
692 peptides that resided within the first 50 N-terminal amino acids. To do this we extracted  
693 peptides for both NSP1+ (NSP over expression) and Vector (vector) samples that fall within  
694 the first 50 amino acid window starting at the N-terminus from the result file (peptide.txt,  
695 Maxquant 1.6.15.0). These peptides were then mapped to the corresponding protein intensities  
696 and the relative changes of log<sub>2</sub> transformed iBAQ values calculated and grouped into three  
697 groups: I. enriched in NSP1+: log<sub>2</sub>(fc) > 2, II. enriched in Vector: log<sub>2</sub>(fc) < -2, III. Not  
698 enriched: -2 <= log<sub>2</sub>(fc) <= 2. The proteins for which data on the half lives in hepatocytes<sup>47</sup>  
699 were extracted and plotted by scaling their mean half-lives corresponding to the proteins in  
700 each group to the interval [0-1] using min-max normalization and generated boxplots for each  
701 of them. We used MATLAB 2019b for the half-life analysis.

702

703 **Statistical analysis.** Statistical analyses were performed using GraphPad PRISM 8 (GraphPad  
704 Software). P-values were determined using a two-tailed Student's t test with Welch's  
705 correction. Unless otherwise stated, data are shown as the mean of at least three biological  
706 replicates ± SEM. Significant differences are indicated as: \*, p < 0.05; \*\*, p < 0.01; \*\*\*, p <  
707 0.001. Statistical parameters are specified in the figure legends.

708

## 709 REFERENCES

710

711 1. Zhou, P. *et al.* A pneumonia outbreak associated with a new coronavirus of probable bat

- 712 origin. *Nature* (2020) doi:10.1038/s41586-020-2012-7.
- 713 2. Wu, F. *et al.* A new coronavirus associated with human respiratory disease in China. *Nature*  
714 (2020) doi:10.1038/s41586-020-2008-3.
- 715 3. Andersen, K. G., Rambaut, A., Lipkin, W. I., Holmes, E. C. & Garry, R. F. The proximal  
716 origin of SARS-CoV-2. *Nature Medicine* (2020) doi:10.1038/s41591-020-0820-9.
- 717 4. Huang, C. *et al.* Clinical features of patients infected with 2019 novel coronavirus in Wuhan,  
718 China. *Lancet* (2020) doi:10.1016/S0140-6736(20)30183-5.
- 719 5. Ferretti, L. *et al.* Quantifying SARS-CoV-2 transmission suggests epidemic control with  
720 digital contact tracing. *Science* (80-. ). (2020) doi:10.1126/science.abb6936.
- 721 6. WHO. Influenza and COVID-19 - similarities and differences. *World Health Organization*  
722 (2020).
- 723 7. Chan-yeung, M. & Xu, R. SARS : epidemiology CUMULATIVE NUMBER OF CASES AND  
724 DEATHS IN VARIOUS COUNTRIES IN. *Respirology* **8**, S9–S14 (2003).
- 725 8. Zumla, A., Hui, D. S. & Perlman, S. Middle East respiratory syndrome. *The Lancet* (2015)  
726 doi:10.1016/S0140-6736(15)60454-8.
- 727 9. Petersen, E. *et al.* Comparing SARS-CoV-2 with SARS-CoV and influenza pandemics. *Lancet*  
728 *Infect. Dis.* **20**, e238–e244 (2020).
- 729 10. Corman, V. M., Muth, D., Niemeyer, D. & Drosten, C. Hosts and Sources of Endemic Human  
730 Coronaviruses. in *Advances in Virus Research* (2018). doi:10.1016/bs.aivir.2018.01.001.
- 731 11. Kell, A. M. & Gale, M. RIG-I in RNA virus recognition. *Virology* (2015)  
732 doi:10.1016/j.virol.2015.02.017.
- 733 12. Totura, A. L. & Baric, R. S. SARS coronavirus pathogenesis: Host innate immune responses  
734 and viral antagonism of interferon. *Current Opinion in Virology* (2012)  
735 doi:10.1016/j.coviro.2012.04.004.

- 736 13. Frieman, M., Heise, M. & Baric, R. SARS coronavirus and innate immunity. *Virus Res.* (2008)  
737 doi:10.1016/j.virusres.2007.03.015.
- 738 14. Takeuchi, O. & Akira, S. Innate immunity to virus infection. *Immunological Reviews* (2009)  
739 doi:10.1111/j.1600-065X.2008.00737.x.
- 740 15. Koepke, L., Gack, M. U. & Sparrer, K. M. The antiviral activities of TRIM proteins. *Current*  
741 *Opinion in Microbiology* (2021) doi:10.1016/j.mib.2020.07.005.
- 742 16. Sparrer, K. M. J. & Gack, M. U. Intracellular detection of viral nucleic acids. *Current Opinion*  
743 *in Microbiology* (2015) doi:10.1016/j.mib.2015.03.001.
- 744 17. Van Gent, M., Sparrer, K. M. J. & Gack, M. U. TRIM proteins and their roles in antiviral host  
745 defenses. *Annu. Rev. Virol.* (2018) doi:10.1146/annurev-virology-092917-043323.
- 746 18. Shojaei, S., Suresh, M., Klionsky, D. J., Labouta, H. I. & Ghavami, S. Autophagy and SARS-  
747 CoV-2 infection: A possible smart targeting of the autophagy pathway. *Virulence* (2020)  
748 doi:10.1080/21505594.2020.1780088.
- 749 19. Maier, H. J. & Britton, P. Involvement of autophagy in coronavirus replication. *Viruses* (2012)  
750 doi:10.3390/v4123440.
- 751 20. Sparrer, K. M. J. & Gack, M. U. TRIM proteins: New players in virus-induced autophagy.  
752 *PLoS Pathogens* (2018) doi:10.1371/journal.ppat.1006787.
- 753 21. Choi, Y., Bowman, J. W. & Jung, J. U. Autophagy during viral infection - A double-edged  
754 sword. *Nature Reviews Microbiology* (2018) doi:10.1038/s41579-018-0003-6.
- 755 22. Iwasaki, A. & Medzhitov, R. Regulation of adaptive immunity by the innate immune system.  
756 *Science* (2010) doi:10.1126/science.1183021.
- 757 23. Iwasaki, A. & Medzhitov, R. Control of adaptive immunity by the innate immune system.  
758 *Nature Immunology* (2015) doi:10.1038/ni.3123.
- 759 24. Zhang, Q. *et al.* Inborn errors of type I IFN immunity in patients with life-threatening COVID-

- 760 19. *Science* (80-. ). eabd4570 (2020) doi:10.1126/science.abd4570.
- 761 25. Bastard, P. *et al.* Auto-antibodies against type I IFNs in patients with life-threatening COVID-  
762 19. *Science* (80-. ). (2020) doi:10.1126/science.abd4585.
- 763 26. Lokugamage, K. *et al.* Type I interferon susceptibility distinguishes SARS-CoV-2 from  
764 SARS-CoV. *bioRxiv Prepr. Serv. Biol.* (2020) doi:10.1101/2020.03.07.982264.
- 765 27. Stukalov, A. *et al.* Multi-level proteomics reveals host-perturbation strategies of SARS-CoV-2  
766 and SARS-CoV. *bioRxiv* (2020) doi:10.1101/2020.06.17.156455.
- 767 28. Blanco-Melo, D. *et al.* Imbalanced Host Response to SARS-CoV-2 Drives Development of  
768 COVID-19. *Cell* (2020) doi:10.1016/j.cell.2020.04.026.
- 769 29. Konno, Y. *et al.* SARS-CoV-2 ORF3b Is a Potent Interferon Antagonist Whose Activity Is  
770 Increased by a Naturally Occurring Elongation Variant. *Cell Rep.* (2020)  
771 doi:10.1016/j.celrep.2020.108185.
- 772 30. Thoms, M. *et al.* Structural basis for translational shutdown and immune evasion by the Nsp1  
773 protein of SARS-CoV-2. *Science* (80-. ). (2020) doi:10.1126/science.abc8665.
- 774 31. Lei, X. *et al.* Activation and evasion of type I interferon responses by SARS-CoV-2. *Nat.*  
775 *Commun.* (2020) doi:10.1038/s41467-020-17665-9.
- 776 32. Xia, H. *et al.* Evasion of Type I Interferon by SARS-CoV-2. *Cell Rep.* 108234 (2020)  
777 doi:10.1016/j.celrep.2020.108234.
- 778 33. Addetia, A. *et al.* SARS-CoV-2 ORF6 disrupts nucleocytoplasmic transport through  
779 interactions with Rae1 and Nup98. *bioRxiv* (2020) doi:10.1101/2020.08.03.234559.
- 780 34. Fragkou, P. C. *et al.* Review of trials currently testing treatment and prevention of COVID-19.  
781 *Clinical Microbiology and Infection* (2020) doi:10.1016/j.cmi.2020.05.019.
- 782 35. Van Zonneveld, M. *et al.* The safety of pegylated interferon alpha-2b in the treatment of  
783 chronic hepatitis B: Predictive factors for dose reduction and treatment discontinuation.

- 784 *Aliment. Pharmacol. Ther.* (2005) doi:10.1111/j.1365-2036.2005.02453.x.
- 785 36. Neri, S. *et al.* A Multidisciplinary Therapeutic Approach for Reducing the Risk of Psychiatric  
786 Side Effects in Patients With Chronic Hepatitis C Treated With Pegylated Interferon  $\alpha$  and  
787 Ribavirin. *J. Clin. Gastroenterol.* (2010) doi:10.1097/MCG.0b013e3181d88af5.
- 788 37. Fried, M. W. Side effects of therapy of hepatitis C and their management. in *Hepatology*  
789 (2002). doi:10.1053/jhep.2002.36810.
- 790 38. Hung, I. F. N. *et al.* Triple combination of interferon beta-1b, lopinavir–ritonavir, and ribavirin  
791 in the treatment of patients admitted to hospital with COVID-19: an open-label, randomised,  
792 phase 2 trial. *Lancet* (2020) doi:10.1016/S0140-6736(20)31042-4.
- 793 39. Gordon, D. E. *et al.* A SARS-CoV-2 protein interaction map reveals targets for drug  
794 repurposing. *Nature* (2020) doi:10.1038/s41586-020-2286-9.
- 795 40. Hachim, A. *et al.* ORF8 and ORF3b antibodies are accurate serological markers of early and  
796 late SARS-CoV-2 infection. *Nat. Immunol.* (2020) doi:10.1038/s41590-020-0773-7.
- 797 41. Klionsky, D. J. *et al.* Guidelines for the use and interpretation of assays for monitoring  
798 autophagy (3rd edition). *Autophagy* (2016) doi:10.1080/15548627.2015.1100356.
- 799 42. Koepke, L. *et al.* An improved method for high-throughput quantification of autophagy in  
800 mammalian cells. *Sci. Rep.* (2020) doi:10.1038/s41598-020-68607-w.
- 801 43. Lei, X. *et al.* Activation and evasion of type I interferon responses by SARS-CoV-2. *Nat.*  
802 *Commun.* **11**, 1–12 (2020).
- 803 44. Yuen, C. K. *et al.* SARS-CoV-2 nsp13, nsp14, nsp15 and orf6 function as potent interferon  
804 antagonists. *Emerg. Microbes Infect.* **9**, 1418–1428 (2020).
- 805 45. Russell, R. C. *et al.* ULK1 induces autophagy by phosphorylating Beclin-1 and activating  
806 VPS34 lipid kinase. *Nat. Cell Biol.* (2013) doi:10.1038/ncb2757.
- 807 46. Wang, C. W. & Klionsky, D. J. The molecular mechanism of autophagy. *Molecular Medicine*



- 808 (2003) doi:10.1007/bf03402040.
- 809 47. Mathieson, T. *et al.* Systematic analysis of protein turnover in primary cells. *Nat. Commun.*  
810 (2018) doi:10.1038/s41467-018-03106-1.
- 811 48. Brandizzi, F. & Barlowe, C. Organization of the ER-Golgi interface for membrane traffic  
812 control. *Nature Reviews Molecular Cell Biology* (2013) doi:10.1038/nrm3588.
- 813 49. Progida, C. & Bakke, O. Bidirectional traffic between the Golgi and the endosomes -  
814 machineries and regulation. *Journal of Cell Science* (2016) doi:10.1242/jcs.185702.
- 815 50. Hansen, M. D. *et al.* Hepatitis C virus triggers Golgi fragmentation and autophagy through the  
816 immunity-related GTPase M. *Proc. Natl. Acad. Sci. U. S. A.* (2017)  
817 doi:10.1073/pnas.1616683114.
- 818 51. Freundt, E. C. *et al.* The Open Reading Frame 3a Protein of Severe Acute Respiratory  
819 Syndrome-Associated Coronavirus Promotes Membrane Rearrangement and Cell Death. *J.*  
820 *Virol.* (2010) doi:10.1128/jvi.01662-09.
- 821 52. Tao, Y., Yang, Y., Zhou, R. & Gong, T. Golgi Apparatus: An Emerging Platform for Innate  
822 Immunity. *Trends in Cell Biology* (2020) doi:10.1016/j.tcb.2020.02.008.
- 823 53. Rieder, M. & Conzelmann, K. K. Rhabdovirus evasion of the interferon system. *Journal of*  
824 *Interferon and Cytokine Research* (2009) doi:10.1089/jir.2009.0068.
- 825 54. Brzózka, K., Finke, S. & Conzelmann, K.-K. Inhibition of Interferon Signaling by Rabies  
826 Virus Phosphoprotein P: Activation-Dependent Binding of STAT1 and STAT2. *J. Virol.*  
827 (2006) doi:10.1128/jvi.80.6.2675-2683.2006.
- 828 55. Brzózka, K., Finke, S. & Conzelmann, K.-K. Identification of the Rabies Virus Alpha/Beta  
829 Interferon Antagonist: Phosphoprotein P Interferes with Phosphorylation of Interferon  
830 Regulatory Factor 3. *J. Virol.* (2005) doi:10.1128/jvi.79.12.7673-7681.2005.
- 831 56. Sparrer, K. M. J., Pfaller, C. K. & Conzelmann, K.-K. Measles Virus C Protein Interferes with

- 832 Beta Interferon Transcription in the Nucleus. *J. Virol.* (2012) doi:10.1128/jvi.05899-11.
- 833 57. Takeuchi, K., Kadota, S. I., Takeda, M., Miyajima, N. & Nagata, K. Measles virus V protein  
834 blocks interferon (IFN)- $\alpha/\beta$  but not IFN- $\gamma$  signaling by inhibiting STAT1 and STAT2  
835 phosphorylation. *FEBS Lett.* (2003) doi:10.1016/S0014-5793(03)00528-3.
- 836 58. Palosaari, H., Parisien, J.-P., Rodriguez, J. J., Ulane, C. M. & Horvath, C. M. STAT Protein  
837 Interference and Suppression of Cytokine Signal Transduction by Measles Virus V Protein. *J.*  
838 *Virol.* (2003) doi:10.1128/jvi.77.13.7635-7644.2003.
- 839 59. Yang, Q. *et al.* TRIM32-TAX1BP1-dependent selective autophagic degradation of TRIF  
840 negatively regulates TLR3/4-mediated innate immune responses. *PLoS Pathog.* (2017)  
841 doi:10.1371/journal.ppat.1006600.
- 842 60. Overå, K. S. *et al.* TRIM32, but not its muscular dystrophy-associated mutant, positively  
843 regulates and is targeted to autophagic degradation by p62/SQSTM1. *J. Cell Sci.* (2019)  
844 doi:10.1242/jcs.236596.
- 845 61. Levine, B., Mizushima, N. & Virgin, H. W. Autophagy in immunity and inflammation. *Nature*  
846 (2011) doi:10.1038/nature09782.
- 847 62. Deretic, V., Saitoh, T. & Akira, S. Autophagy in infection, inflammation and immunity.  
848 *Nature Reviews Immunology* (2013) doi:10.1038/nri3532.
- 849 63. Matsuzawa-Ishimoto, Y., Hwang, S. & Cadwell, K. Autophagy and Inflammation. *Annual*  
850 *Review of Immunology* (2018) doi:10.1146/annurev-immunol-042617-053253.
- 851 64. Chiang, J. J. *et al.* Viral unmasking of cellular 5S rRNA pseudogene transcripts induces RIG-I-  
852 mediated immunity article. *Nat. Immunol.* (2018) doi:10.1038/s41590-017-0005-y.
- 853 65. Sparrer, K. M. J. *et al.* TRIM23 mediates virus-induced autophagy via activation of TBK1.  
854 *Nat. Microbiol.* (2017) doi:10.1038/s41564-017-0017-2.
- 855 66. Padhan, K. *et al.* Severe acute respiratory syndrome coronavirus Orf3a protein interacts with

- 856 caveolin. *J. Gen. Virol.* (2007) doi:10.1099/vir.0.82856-0.
- 857 67. Kagan, J. C. Signaling organelles of the innate immune system. *Cell* (2012)  
858 doi:10.1016/j.cell.2012.11.011.
- 859 68. Baez-Santos, Y. M., Mielech, A. M., Deng, X., Baker, S. & Mesecar, A. D. Catalytic Function  
860 and Substrate Specificity of the Papain-Like Protease Domain of nsp3 from the Middle East  
861 Respiratory Syndrome Coronavirus. *J. Virol.* (2014) doi:10.1128/jvi.01294-14.
- 862 69. Lei, J., Kusov, Y. & Hilgenfeld, R. Nsp3 of coronaviruses: Structures and functions of a large  
863 multi-domain protein. *Antiviral Research* (2018) doi:10.1016/j.antiviral.2017.11.001.
- 864 70. Shin, D. *et al.* Papain-like protease regulates SARS-CoV-2 viral spread and innate immunity.  
865 *Nature* (2020) doi:10.1038/s41586-020-2601-5.
- 866 71. Stobart, C. C. *et al.* Chimeric Exchange of Coronavirus nsp5 Proteases (3CLpro) Identifies  
867 Common and Divergent Regulatory Determinants of Protease Activity. *J. Virol.* (2013)  
868 doi:10.1128/jvi.02050-13.
- 869 72. Muramatsu, T. *et al.* SARS-CoV 3CL protease cleaves its C-terminal autoprocessing site by  
870 novel subsite cooperativity. *Proc. Natl. Acad. Sci. U. S. A.* (2016)  
871 doi:10.1073/pnas.1601327113.
- 872 73. Ivanov, K. A. & Ziebuhr, J. Human Coronavirus 229E Nonstructural Protein 13:  
873 Characterization of Duplex-Unwinding, Nucleoside Triphosphatase, and RNA 5'-  
874 Triphosphatase Activities. *J. Virol.* (2004) doi:10.1128/jvi.78.14.7833-7838.2004.
- 875 74. Shu, T. *et al.* SARS-Coronavirus-2 Nsp13 Possesses NTPase and RNA Helicase Activities  
876 That Can Be Inhibited by Bismuth Salts. *Virol. Sin.* (2020) doi:10.1007/s12250-020-00242-1.
- 877 75. Deng, X. & Baker, S. C. An “Old” protein with a new story: Coronavirus endoribonuclease is  
878 important for evading host antiviral defenses. *Virology* (2018) doi:10.1016/j.virol.2017.12.024.
- 879 76. Seyran, M. *et al.* Questions concerning the proximal origin of SARS-CoV-2. *J. Med. Virol.*

- 880 (2020) doi:10.1002/jmv.26478.
- 881 77. Zhang, T., Wu, Q. & Zhang, Z. Probable Pangolin Origin of SARS-CoV-2 Associated with the  
882 COVID-19 Outbreak. *Curr. Biol.* (2020) doi:10.1016/j.cub.2020.03.022.
- 883 78. Lam, T. T. Y. *et al.* Identifying SARS-CoV-2-related coronaviruses in Malayan pangolins.  
884 *Nature* (2020) doi:10.1038/s41586-020-2169-0.
- 885 79. Ribero, M. S., Jouvenet, N., Dreux, M. & Nisole, S. Interplay between SARS-CoV-2 and the  
886 type I interferon response. *PLoS Pathogens* (2020) doi:10.1371/journal.ppat.1008737.
- 887 80. Nchioua, R. *et al.* The Zinc Finger Antiviral Protein restricts SARS-CoV-2. *bioRxiv* (2020).  
888 doi:10.1101/2020.06.04.134379.
- 889 81. Hadjadj, J. *et al.* Impaired type I interferon activity and inflammatory responses in severe  
890 COVID-19 patients. *Science* (80-. ). (2020) doi:10.1126/science.abc6027.
- 891 82. Tay, M. Z., Poh, C. M., Rénia, L., MacAry, P. A. & Ng, L. F. P. The trinity of COVID-19:  
892 immunity, inflammation and intervention. *Nature Reviews Immunology* (2020)  
893 doi:10.1038/s41577-020-0311-8.
- 894 83. Chen, G. *et al.* Clinical and immunological features of severe and moderate coronavirus  
895 disease 2019. *J. Clin. Invest.* (2020) doi:10.1172/JCI137244.
- 896 84. Sette, A. & Crotty, S. Pre-existing immunity to SARS-CoV-2: the knowns and unknowns.  
897 *Nature Reviews Immunology* (2020) doi:10.1038/s41577-020-0389-z.
- 898 85. Le Bert, N. *et al.* SARS-CoV-2-specific T cell immunity in cases of COVID-19 and SARS,  
899 and uninfected controls. *Nature* (2020) doi:10.1038/s41586-020-2550-z.
- 900 86. Sleijfer, S., Bannink, M., Van Gool, A. R., Kruit, W. H. J. & Stoter, G. Side effects of  
901 interferon- $\alpha$  therapy. *Pharmacy World and Science* (2005) doi:10.1007/s11096-005-1319-7.
- 902 87. Pfaller, C. K. & Conzelmann, K.-K. Measles Virus V Protein Is a Decoy Substrate for I $\kappa$ B  
903 Kinase  $\alpha$  and Prevents Toll-Like Receptor 7/9-Mediated Interferon Induction. *J. Virol.* (2008)

904 doi:10.1128/jvi.01321-08.

905 88. Langer, S. *et al.* Hiv-1 vpu is a potent transcriptional suppressor of nf-kb-elicited antiviral  
906 immune responses. *Elife* (2019) doi:10.7554/eLife.41930.

907 89. Fu, B. *et al.* TRIM32 Senses and Restricts Influenza A Virus by Ubiquitination of PB1  
908 Polymerase. *PLoS Pathog.* (2015) doi:10.1371/journal.ppat.1004960.

909 90. Bozzo, C. P. *et al.* IFITM proteins promote SARS-CoV-2 infection of human lung cells.  
910 *bioRxiv* (2020) doi:10.1101/2020.08.18.255935.

911

Figure 1

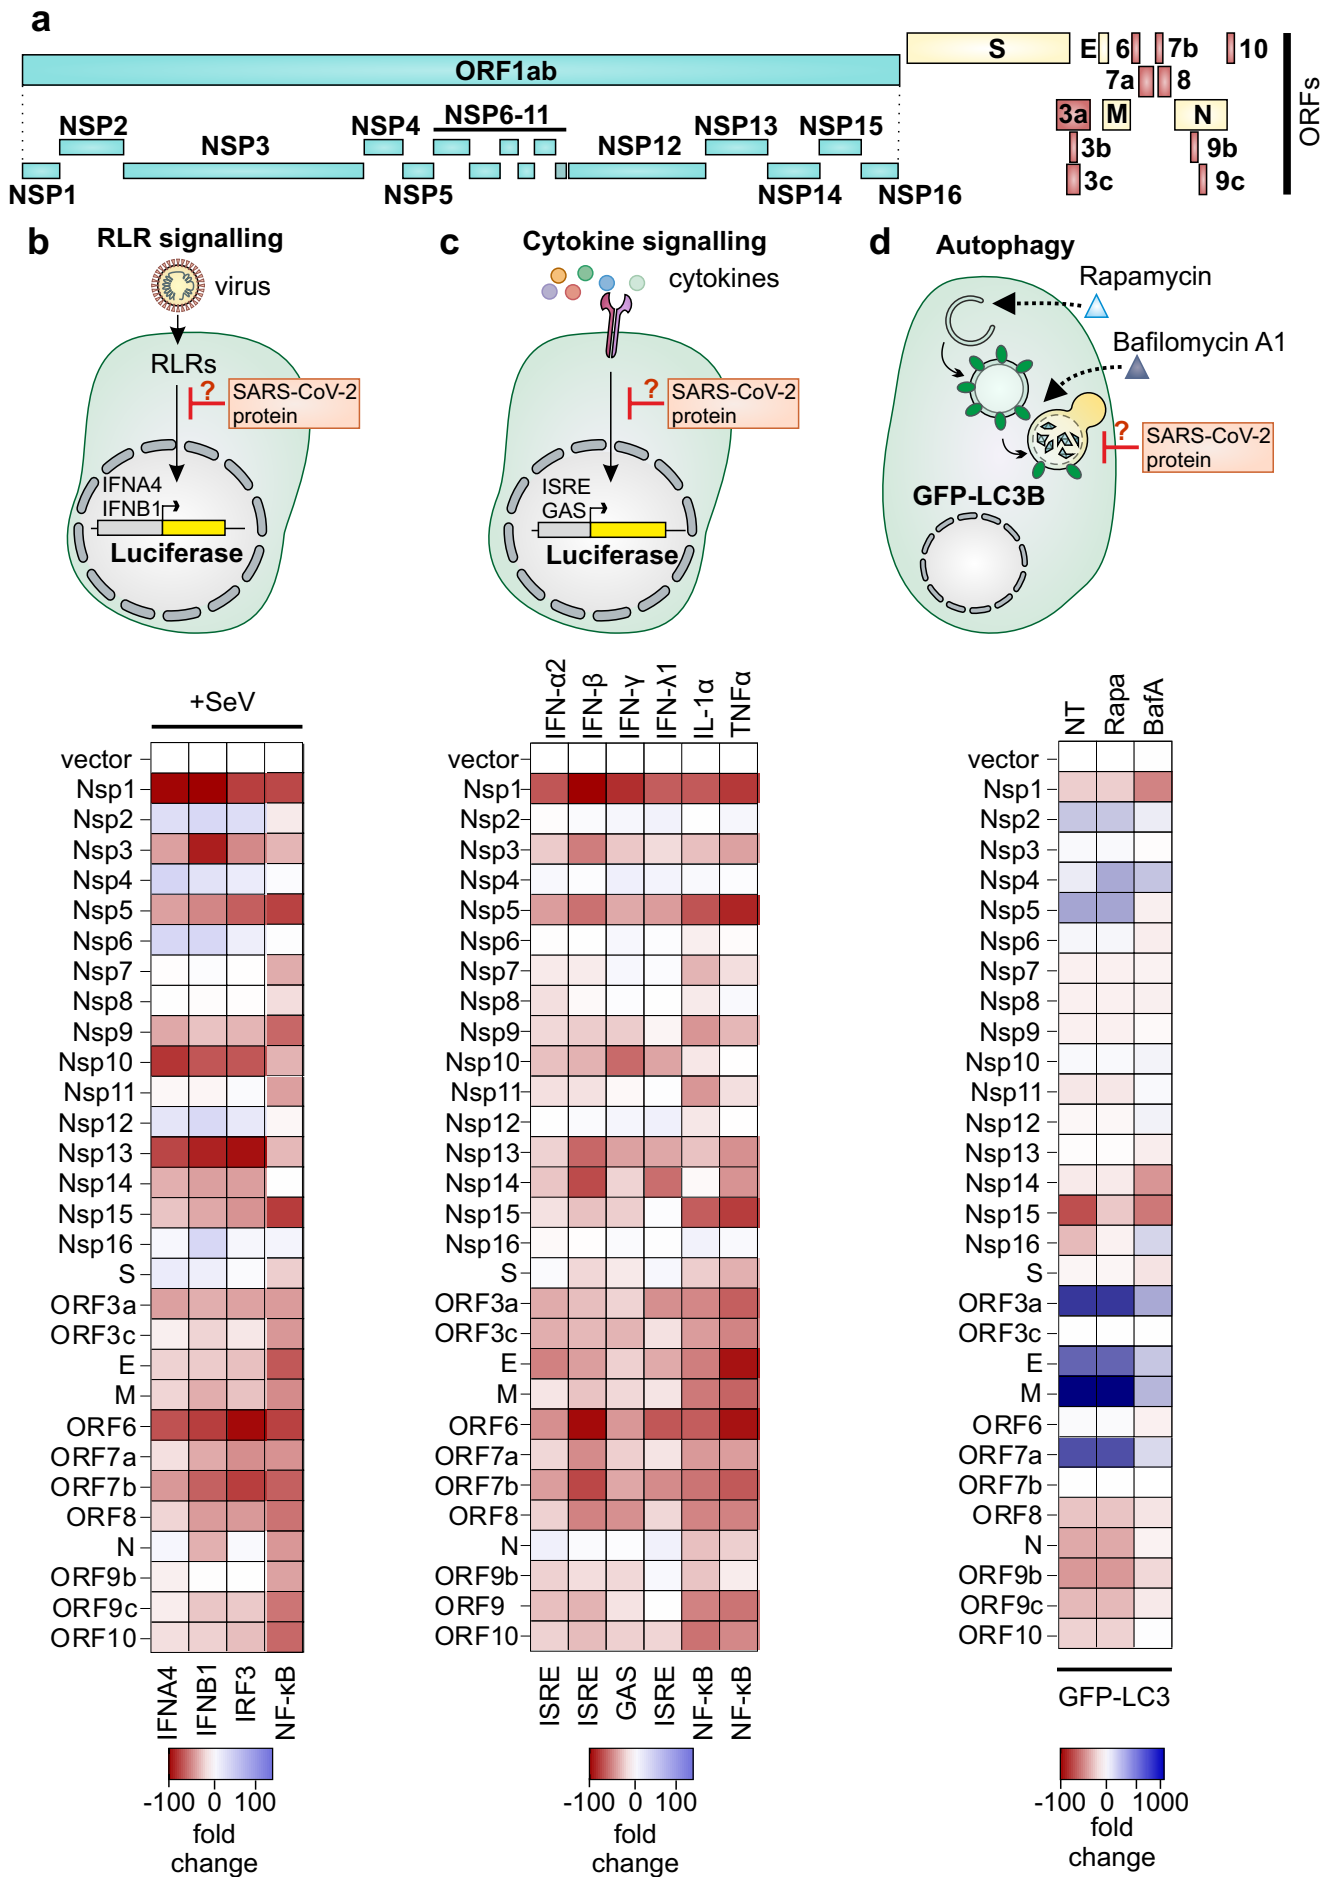

Figure 2

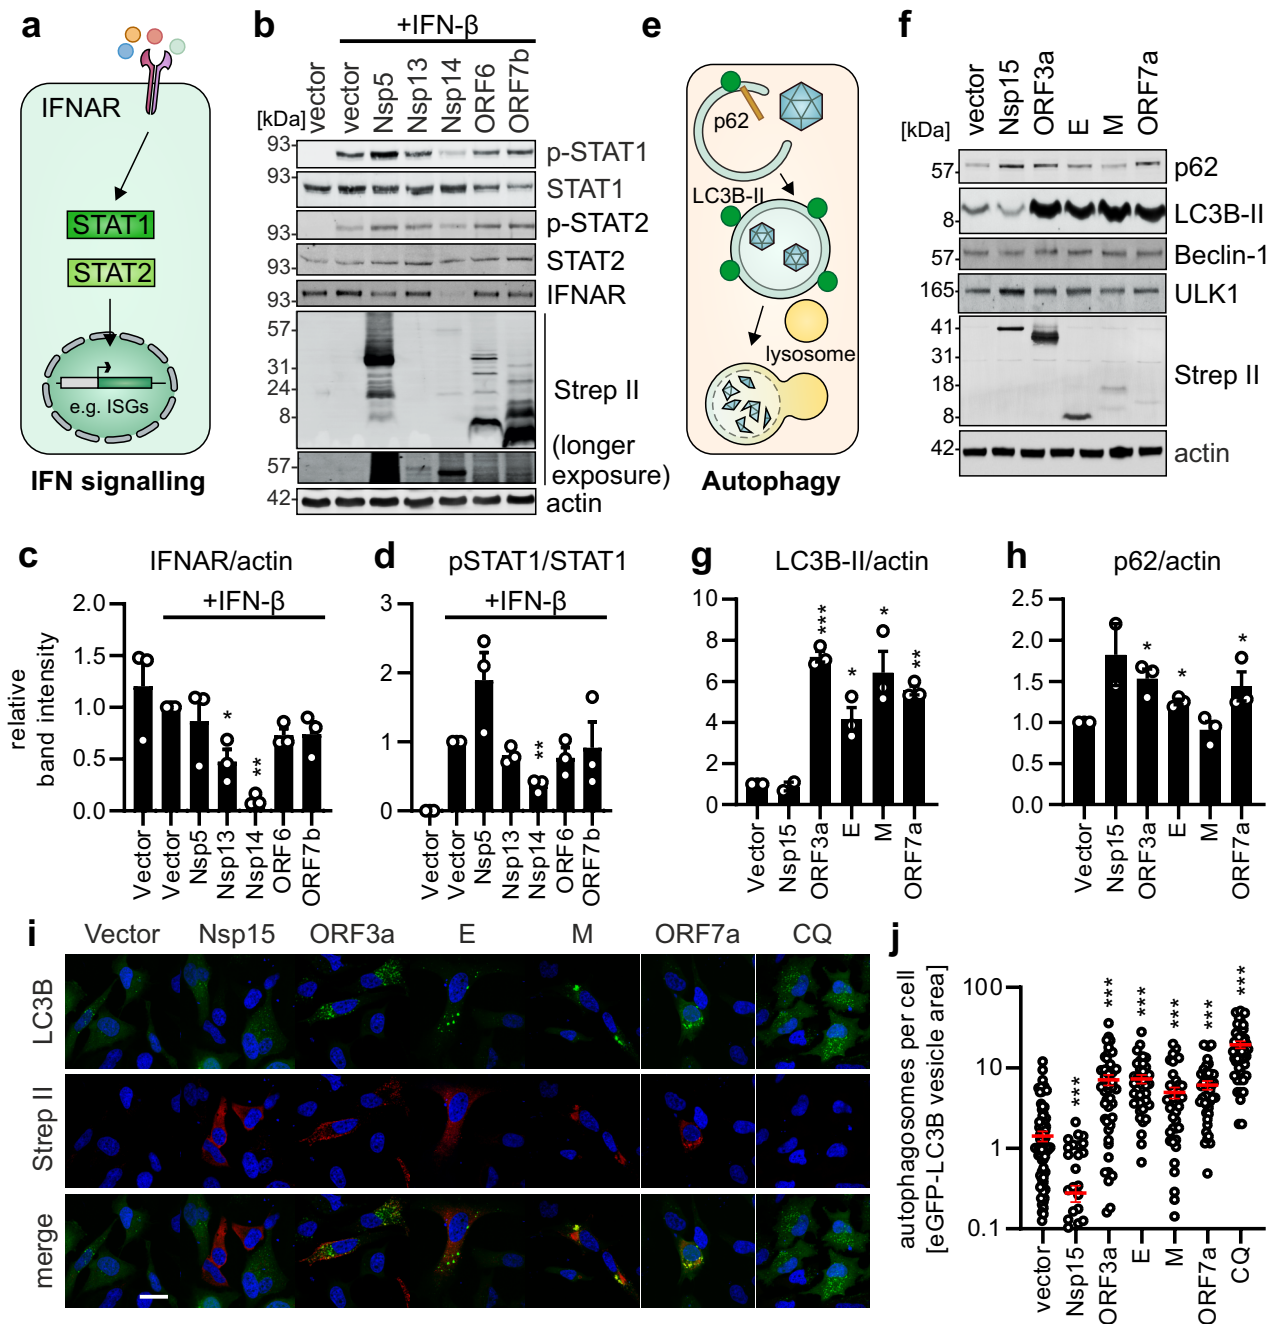

### Figure 3

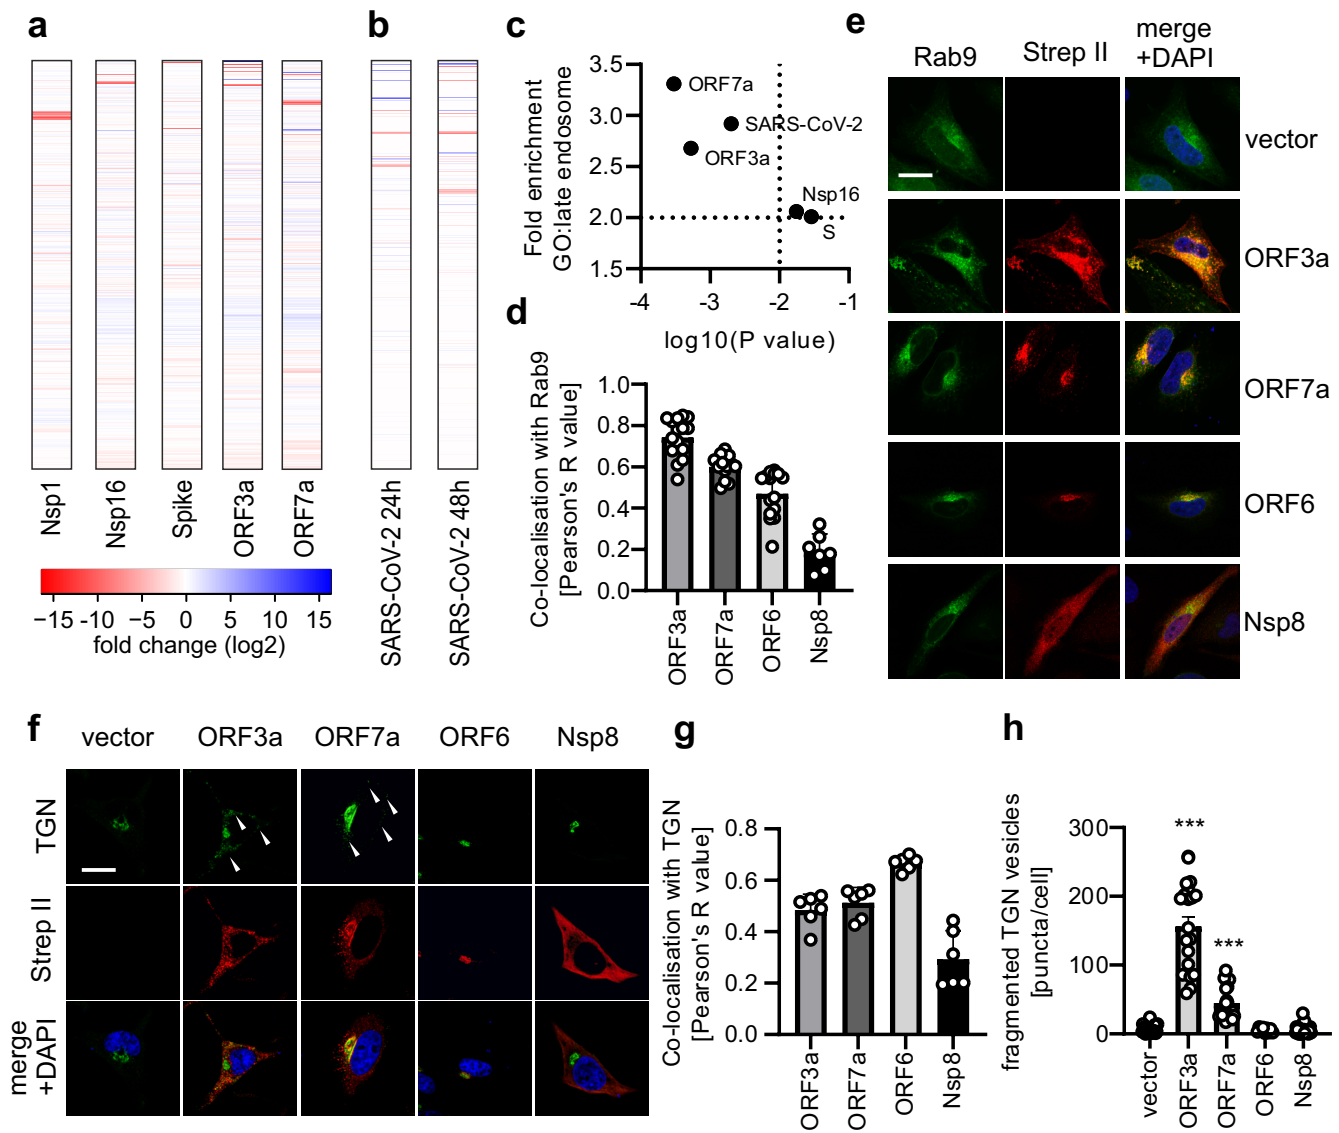



Figure 4

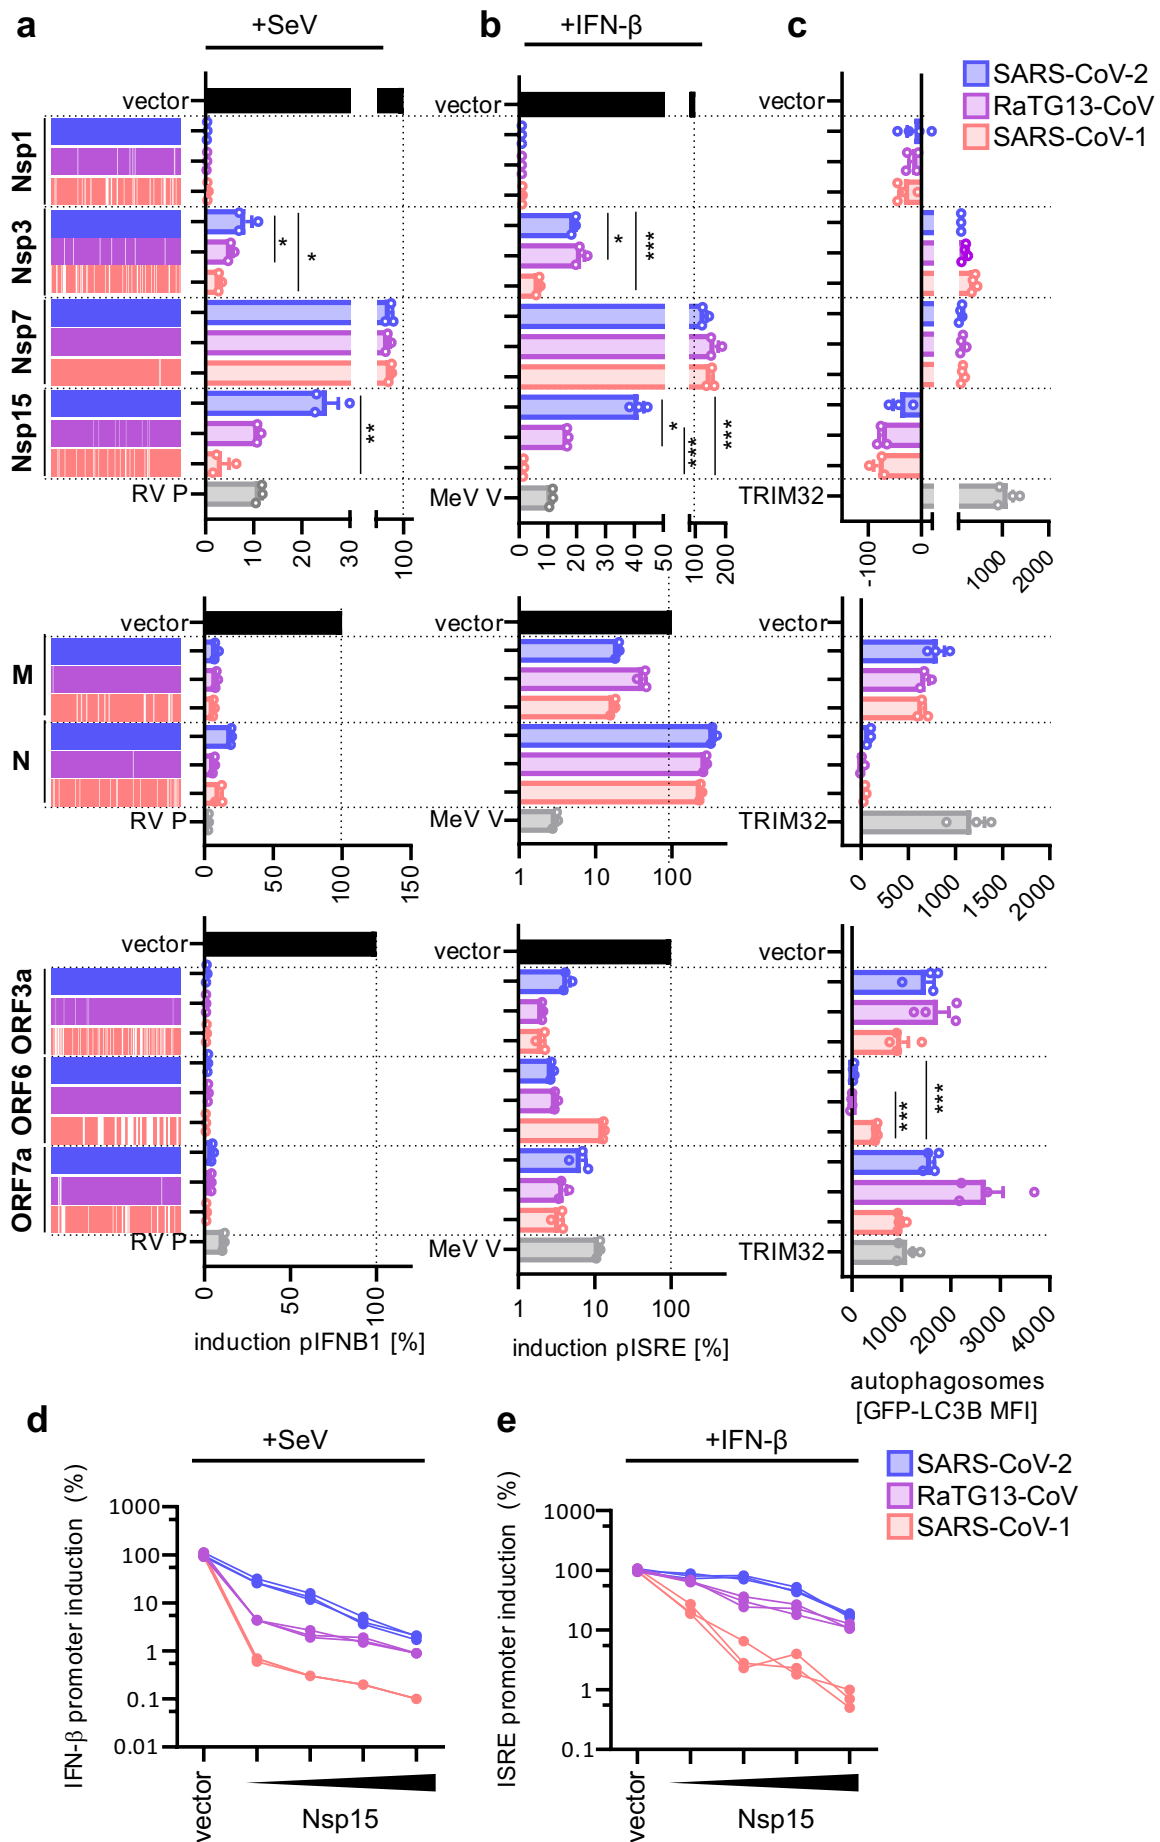

Figure 5

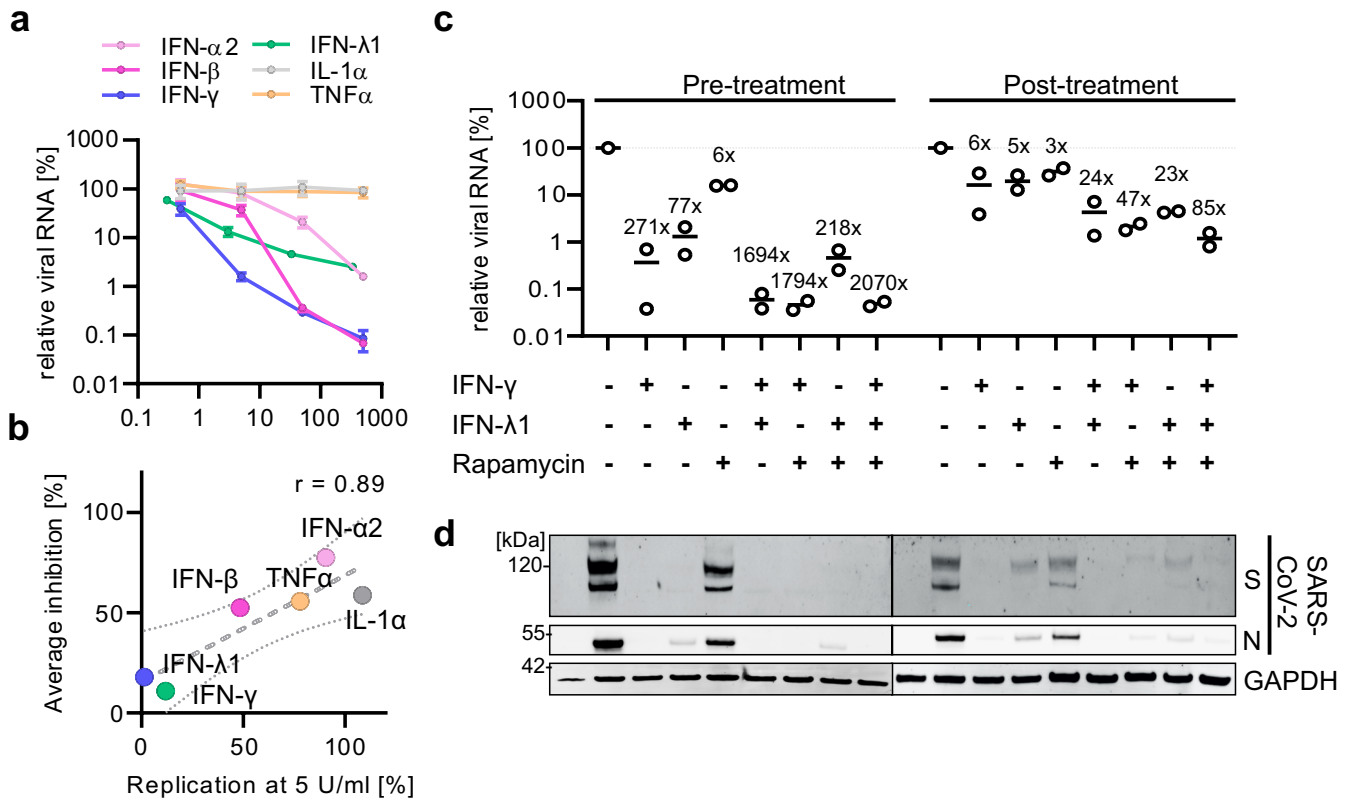

Source: https://www.biorxiv.org/content/biorxiv/early/2020/10/15/2020.10.15.340612.full.pdf
